# Supplementary material for: Clusters of atmospheric relevance: H2O/HCl/HNO3. Prediction of IR & MW spectra
Source: Royal Society of Chemistry journal article supplement (doi:10.1039/b924890k), 2010-01-01
Supplement: b924890k.pdf [file b924890k.pdf]

**Supplementary material to the manuscript “Clusters of atmospheric relevance: H<sub>2</sub>O/HCl/HNO<sub>3</sub>. Prediction of IR & MW spectra”, by P. C. Gómez et al.**

**Supplement to Section 3.1**

Assignment of individual spectra

The assignment of the spectra shown in Figure 3 is discussed in more detail in the following paragraphs. Below the spectrum of N1AC-3 is the spectrum of W2A, a species where water accepts protons from its two neighbours. The excess of positive charge in the O atom of water implies a weaker Hydrogen Bond (HB) with HNO<sub>3</sub> than in the N1AC series, resulting in a higher frequency and a loss of intensity (notice absorbance scale) of the O-H (HNO<sub>3</sub>) stretch. On the other hand, the link between HCl and H<sub>2</sub>O is stronger than that between HCl and HNO<sub>3</sub> in the former family, resulting in a slight redshift of the now weaker H-Cl bond stretch.

The same effects are enhanced in the spectrum below. This species, N1AW-4, has quite a different structure, with a larger HCl→H<sub>2</sub>O proton transfer, yielding a lower frequency H-Cl vibration, which becomes the most intense band in the spectrum. There is a small HNO<sub>3</sub>→HCl proton transfer, and the H-O (HNO<sub>3</sub>) vibration appears weaker in intensity and higher in wavenumber than in previous cases, becoming closer to the wavenumber value in the free monomer. In the mid-frequency region, the HOH bending, at 1627 cm<sup>-1</sup>, becomes very weak, and the NOH bend is red-shifted and overlaps the NO<sub>2</sub> symmetric stretch, giving one single stronger band.

When the water molecule is not near HCl, as in N1AW-2 represented next in the right-hand panels of Figure 3, the spectrum changes drastically. The HCl unit of the cluster is weakly bound to HNO<sub>3</sub> by a very limited proton transfer from the latter. This causes the O-H (HNO<sub>3</sub>) to appear at higher wavenumber than in the preceding molecules, and although this vibration is the strongest of the spectrum, its absolute absorbance value is lower than in other spectra. The HCl stretch is here very weak, indicating that this vibration induces only a small global dipole variation for the cluster. Also the HOH bend is very weak, but in this case the next two vibrations in decreasing frequency are not overlapping as they did for N1AW-4.

Some of these effects are even more marked in the spectrum of N2A-1W3C, shown next in representation of the weakest bound species of this study. The O-H (HNO<sub>3</sub>) stretch is weaker than the NO<sub>2</sub> asymmetric stretch, which involves also the motion of the attached H atom and creates a large induced dipole moment. There is a HCl→HNO<sub>3</sub> proton transfer, and thus the H-Cl stretch recovers its wavenumber and intensity, as in the N1AC series at the top of the Figure.

Finally, Figure 3 shows at the bottom the spectrum of a peculiar structure found in this series, labelled N1AC-oop-ring, a name that conveys the idea of a non-planar, ring-like configuration. This is the only clearly non-planar, stable structure found for this whole set of clusters. The HCl acts as proton donor to HNO<sub>3</sub> and proton acceptor from H<sub>2</sub>O, situated in a parallel plane to the nitric acid. Interestingly, the spectrum of this cluster is fairly close to that of N2A-1W3C shown above, except for the far-infrared region, which reveals the powerful utility of this spectral zone to convey information on the inter-molecular structure of clusters.

A last point to raise corresponds to the NO<sub>2</sub> asymmetric stretching ( $\sim 1735\text{ cm}^{-1}$ ) and water bending ( $\sim 1630\text{ cm}^{-1}$ ) modes, which appear at almost unchanged frequency in the whole series, and with only minor intensity fluctuations, close also the corresponding values for the free monomers. These vibrations are therefore quite local, and are not perturbed by varying the bonds formed in the diverse structures created in the clusters.

**Table 2b. Full list of predicted wavenumbers (in  $\text{cm}^{-1}$ ) and intensities ( $\text{km mole}^{-1}$ ) for the whole set of clusters studied in this work.**

| n1ac-5 |         | n1ac-1 |         | n1ac-3 |         | n1ac-2 |         | n1aw-5 |         | n1ac-4 |         | w2a   |         | n1aw-4 |         | n1aw-1p |         | n1aw-2 |         | n1aw-2p |         | n1ac-oop-ring |         | n1aw-1 |         |
|--------|---------|--------|---------|--------|---------|--------|---------|--------|---------|--------|---------|-------|---------|--------|---------|---------|---------|--------|---------|---------|---------|---------------|---------|--------|---------|
| Freq.  | Intens. | Freq. | Intens. | Freq.  | Intens. | Freq.   | Intens. | Freq.  | Intens. | Freq.   | Intens. | Freq.         | Intens. | Freq.  | Intens. |
| 17     | 1       | 22     | 5       | 24     | 2       | 20     | 1       | 23     | 1       | 12     | 5       | 18    | 2       | 22     | 0.1     | 19      | 3       | 13     | 0       | 12      | 15      | 39            | 1       | 14     |         |
| 71     | 2       | 25     | 1       | 27     | 0       | 25     | 1       | 62     | 2       | 24     | 0       | 30    | 1       | 48     | 8       | 32      | 1       | 21     | 3       | 19      | 2       | 53            | 6       | 21     |         |
| 75     | 3       | 71     | 2       | 78     | 2       | 80     | 6       | 77     | 1       | 63     | 3       | 74    | 2       | 53     | 4       | 57      | 0.5     | 53     | 77      | 56      | 0.1     | 66            | 2       | 36     |         |
| 106    | 9       | 78     | 2       | 83     | 4       | 81     | 11      | 120    | 1       | 81     | 9       | 102   | 15      | 91     | 1       | 71      | 7       | 58     | 33      | 65      | 11      | 73            | 3       | 44     |         |
| 141    | 3       | 104    | 20      | 100    | 25      | 100    | 7       | 133    | 20      | 99     | 10      | 148   | 17      | 110    | 4       | 99      | 1       | 72     | 11      | 72      | 82      | 93            | 9       | 68     |         |
| 175    | 80      | 152    | 49      | 157    | 49      | 166    | 55      | 202    | 12      | 162    | 45      | 189   | 21      | 177    | 13      | 121     | 10      | 82     | 3       | 82      | 2       | 102           | 10      | 74     |         |
| 231    | 25      | 230    | 22      | 231    | 24      | 234    | 16      | 225    | 90      | 234    | 21      | 238   | 20      | 192    | 80      | 131     | 106     | 119    | 8       | 117     | 5       | 154           | 38      | 93     |         |
| 316    | 16      | 307    | 176     | 311    | 195     | 315    | 184     | 311    | 52      | 291    | 36      | 320   | 50      | 279    | 59      | 187     | 19      | 182    | 21      | 181     | 26      | 216           | 90      | 103    |         |
| 355    | 81      | 364    | 29      | 350    | 22      | 352    | 25      | 439    | 162     | 312    | 185     | 411   | 30      | 396    | 151     | 268     | 82      | 212    | 104     | 206     | 73      | 281           | 151     | 230    |         |
| 377    | 120     | 375    | 29      | 356    | 10      | 356    | 23      | 616    | 2       | 316    | 26      | 500   | 211     | 576    | 7       | 287     | 77      | 268    | 58      | 271     | 64      | 338           | 44      | 269    |         |
| 527    | 33      | 410    | 39      | 414    | 59      | 415    | 61      | 660    | 24      | 411    | 46      | 540   | 78      | 605    | 37      | 410     | 89      | 364    | 87      | 361     | 90      | 442           | 20      | 384    |         |
| 655    | 4       | 656    | 4       | 652    | 1       | 653    | 1       | 686    | 3       | 646    | 2       | 642   | 8       | 617    | 117     | 621     | 8       | 606    | 84      | 607     | 84      | 467           | 147     | 602    |         |
| 698    | 5       | 696    | 2       | 696    | 1       | 698    | 2       | 691    | 111     | 683    | 7       | 683   | 4       | 662    | 25      | 628     | 79      | 617    | 1       | 617     | 1       | 601           | 5       | 614    |         |
| 795    | 25      | 798    | 18      | 798    | 17      | 799    | 16      | 794    | 4       | 793    | 18      | 789   | 70      | 753    | 91      | 681     | 3       | 679    | 5       | 681     | 3       | 673           | 6       | 675    |         |
| 878    | 86      | 879    | 99      | 879    | 99      | 879    | 101     | 856    | 41      | 873    | 95      | 811   | 65      | 789    | 8       | 793     | 8       | 792    | 8       | 793     | 8       | 784           | 14      | 792    |         |
| 966    | 132     | 965    | 145     | 962    | 129     | 965    | 152     | 947    | 151     | 930    | 195     | 939   | 155     | 904    | 208     | 940     | 158     | 935    | 160     | 937     | 171     | 931           | 165     | 930    |         |
| 1333   | 281     | 1326   | 344     | 1343   | 264     | 1345   | 351     | 1336   | 190     | 1332   | 278     | 1325  | 204     | 1332   | 379     | 1328    | 201     | 1345   | 231     | 1342    | 225     | 1339          | 316     | 1336   |         |
| 1462   | 321     | 1476   | 236     | 1471   | 257     | 1471   | 263     | 1379   | 258     | 1477   | 186     | 1454  | 207     | 1339   | 163     | 1387    | 208     | 1378   | 164     | 1378    | 189     | 1358          | 97      | 1368   |         |
| 1635   | 96      | 1620   | 154     | 1618   | 178     | 1618   | 166     | 1625   | 41      | 1619   | 152     | 1620  | 135     | 1627   | 54      | 1645    | 14      | 1642   | 47      | 1641    | 52      | 1641          | 52      | 1643   |         |
| 1723   | 342     | 1733   | 289     | 1730   | 359     | 1727   | 252     | 1724   | 392     | 1744   | 282     | 1741  | 345     | 1742   | 376     | 1729    | 446     | 1727   | 449     | 1725    | 430     | 1731          | 373     | 1733   |         |
| 2795   | 365     | 2800   | 516     | 2814   | 491     | 2810   | 509     | 2272   | 1442    | 2850   | 343     | 2769  | 555     | 2455   | 1015    | 2891    | 68      | 2890   | 69      | 2896    | 64      | 2796          | 357     | 2916   |         |
| 3146   | 1297    | 3167   | 1225    | 3169   | 1303    | 3170   | 1276    | 3422   | 841     | 3162   | 1235    | 3357  | 807     | 3554   | 452     | 3502    | 604     | 3539   | 585     | 3538    | 592     | 3713          | 110     | 3568   |         |
| 3700   | 250     | 3785   | 21      | 3784   | 21      | 3783   | 21      | 3737   | 187     | 3784   | 22      | 3728  | 103     | 3760   | 69      | 3757    | 158     | 3780   | 114     | 3782    | 103     | 3773          | 59      | 3774   |         |
| 3864   | 146     | 3887   | 120     | 3886   | 114     | 3886   | 118     | 3863   | 179     | 3886   | 112     | 3853  | 136     | 3872   | 148     | 3875    | 132     | 3889   | 150     | 3890    | 112     | 3882          | 100     | 3887   |         |

**Table 3b. Predicted strong microwave transitions at 10 K for the clusters of Figure 4, using Watson's A-reduction. Intensity cut at  $0.1 \times 10^{-4}$ .**

**N1AC-5: a-type transitions ( $J''=0-25$ )**

| J' | Ka' | Kc' | <-- | J'' | Ka'' | Kc'' | Frequency<br>(MHz) | logarithm<br>of intensity |
|----|-----|-----|-----|-----|------|------|--------------------|---------------------------|
| 5  | 1   | 4   |     | 4   | 1    | 3    | 10063.288          | 0.158E-03                 |
| 6  | 1   | 6   |     | 5   | 1    | 5    | 10611.710          | 0.206E-03                 |
| 6  | 0   | 6   |     | 5   | 0    | 5    | 10939.013          | 0.227E-03                 |
| 13 | 2   | 11  |     | 13  | 2    | 12   | 11223.954          | 0.113E-04                 |
| 17 | 3   | 14  |     | 17  | 3    | 15   | 11368.617          | 0.105E-04                 |
| 6  | 2   | 5   |     | 5   | 2    | 4    | 11374.643          | 0.206E-03                 |
| 6  | 5   | 2   |     | 5   | 5    | 1    | 11490.562          | 0.555E-04                 |
| 6  | 5   | 1   |     | 5   | 5    | 0    | 11490.571          | 0.555E-04                 |
| 6  | 4   | 3   |     | 5   | 4    | 2    | 11505.112          | 0.113E-03                 |
| 6  | 4   | 2   |     | 5   | 4    | 1    | 11506.027          | 0.113E-03                 |
| 6  | 3   | 4   |     | 5   | 3    | 3    | 11521.483          | 0.168E-03                 |
| 6  | 3   | 3   |     | 5   | 3    | 2    | 11560.658          | 0.169E-03                 |
| 6  | 2   | 4   |     | 5   | 2    | 3    | 11883.733          | 0.224E-03                 |
| 6  | 1   | 5   |     | 5   | 1    | 4    | 12019.121          | 0.259E-03                 |
| 7  | 1   | 7   |     | 6   | 1    | 6    | 12336.580          | 0.310E-03                 |
| 7  | 0   | 7   |     | 6   | 0    | 6    | 12609.580          | 0.332E-03                 |
| 7  | 2   | 6   |     | 6   | 2    | 5    | 13229.257          | 0.317E-03                 |
| 14 | 2   | 12  |     | 14  | 2    | 13   | 13377.598          | 0.132E-04                 |
| 7  | 6   | 2   |     | 6   | 6    | 1    | 13403.719          | 0.628E-04                 |
| 7  | 6   | 1   |     | 6   | 6    | 0    | 13403.720          | 0.628E-04                 |
| 7  | 5   | 3   |     | 6   | 5    | 2    | 13416.159          | 0.133E-03                 |
| 7  | 5   | 2   |     | 6   | 5    | 1    | 13416.204          | 0.133E-03                 |
| 7  | 4   | 4   |     | 6   | 4    | 3    | 13438.585          | 0.206E-03                 |
| 7  | 4   | 3   |     | 6   | 4    | 2    | 13441.617          | 0.206E-03                 |
| 7  | 3   | 5   |     | 6   | 3    | 4    | 13453.973          | 0.273E-03                 |
| 7  | 3   | 4   |     | 6   | 3    | 3    | 13540.338          | 0.277E-03                 |
| 18 | 3   | 15  |     | 18  | 3    | 16   | 13702.492          | 0.122E-04                 |
| 7  | 1   | 6   |     | 6   | 1    | 5    | 13937.863          | 0.385E-03                 |
| 7  | 2   | 5   |     | 6   | 2    | 4    | 13973.832          | 0.351E-03                 |
| 8  | 1   | 8   |     | 7   | 1    | 7    | 14048.315          | 0.434E-03                 |
| 8  | 0   | 8   |     | 7   | 0    | 7    | 14259.092          | 0.455E-03                 |
| 8  | 2   | 7   |     | 7   | 2    | 6    | 15065.794          | 0.448E-03                 |
| 8  | 7   | 2   |     | 7   | 7    | 1    | 15317.058          | 0.656E-04                 |
| 8  | 7   | 1   |     | 7   | 7    | 0    | 15317.058          | 0.656E-04                 |
| 8  | 6   | 3   |     | 7   | 6    | 2    | 15328.043          | 0.144E-03                 |
| 8  | 6   | 2   |     | 7   | 6    | 1    | 15328.045          | 0.144E-03                 |
| 8  | 5   | 4   |     | 7   | 5    | 3    | 15346.593          | 0.232E-03                 |
| 8  | 5   | 3   |     | 7   | 5    | 2    | 15346.773          | 0.232E-03                 |
| 8  | 4   | 5   |     | 7   | 4    | 4    | 15378.495          | 0.320E-03                 |
| 8  | 3   | 6   |     | 7   | 3    | 5    | 15385.065          | 0.401E-03                 |
| 8  | 4   | 4   |     | 7   | 4    | 3    | 15386.754          | 0.321E-03                 |
| 8  | 3   | 5   |     | 7   | 3    | 4    | 15552.286          | 0.410E-03                 |
| 15 | 2   | 13  |     | 15  | 2    | 14   | 15578.525          | 0.146E-04                 |
| 9  | 1   | 9   |     | 8   | 1    | 8    | 15748.629          | 0.573E-03                 |
| 8  | 1   | 7   |     | 7   | 1    | 6    | 15809.706          | 0.530E-03                 |
| 9  | 0   | 9   |     | 8   | 0    | 8    | 15901.671          | 0.592E-03                 |
| 8  | 2   | 6   |     | 7   | 2    | 5    | 16063.796          | 0.504E-03                 |
| 19 | 3   | 16  |     | 19  | 3    | 17   | 16130.116          | 0.135E-04                 |
| 9  | 2   | 8   |     | 8   | 2    | 7    | 16882.693          | 0.595E-03                 |
| 9  | 8   | 2   |     | 8   | 8    | 1    | 17230.503          | 0.641E-04                 |
| 9  | 8   | 1   |     | 8   | 8    | 0    | 17230.503          | 0.641E-04                 |
| 9  | 7   | 3   |     | 8   | 7    | 2    | 17240.526          | 0.146E-03                 |
| 9  | 7   | 2   |     | 8   | 7    | 1    | 17240.526          | 0.146E-03                 |
| 9  | 6   | 4   |     | 8   | 6    | 3    | 17256.183          | 0.242E-03                 |
| 9  | 6   | 3   |     | 8   | 6    | 2    | 17256.192          | 0.242E-03                 |
| 9  | 5   | 5   |     | 8   | 5    | 4    | 17282.520          | 0.347E-03                 |
| 9  | 5   | 4   |     | 8   | 5    | 3    | 17283.103          | 0.347E-03                 |
| 9  | 3   | 7   |     | 8   | 3    | 6    | 17311.000          | 0.547E-03                 |
| 9  | 4   | 6   |     | 8   | 4    | 5    | 17324.727          | 0.453E-03                 |
| 9  | 4   | 5   |     | 8   | 4    | 4    | 17344.284          | 0.454E-03                 |
| 10 | 1   | 10  |     | 9   | 1    | 9    | 17439.571          | 0.722E-03                 |
| 10 | 0   | 10  |     | 9   | 0    | 9    | 17545.596          | 0.739E-03                 |
| 9  | 3   | 6   |     | 8   | 3    | 5    | 17602.911          | 0.564E-03                 |
| 9  | 1   | 8   |     | 8   | 1    | 7    | 17626.027          | 0.686E-03                 |
| 16 | 2   | 14  |     | 16  | 2    | 15   | 17775.080          | 0.154E-04                 |

|    |    |    |    |    |    |           |           |
|----|----|----|----|----|----|-----------|-----------|
| 9  | 2  | 7  | 8  | 2  | 6  | 18134.983 | 0.675E-03 |
| 20 | 3  | 17 | 20 | 3  | 18 | 18593.620 | 0.142E-04 |
| 10 | 2  | 9  | 9  | 2  | 8  | 18679.055 | 0.750E-03 |
| 11 | 1  | 11 | 10 | 1  | 10 | 19123.215 | 0.876E-03 |
| 10 | 9  | 2  | 9  | 9  | 1  | 19144.013 | 0.589E-04 |
| 10 | 9  | 1  | 9  | 9  | 0  | 19144.013 | 0.589E-04 |
| 10 | 8  | 3  | 9  | 8  | 2  | 19153.361 | 0.138E-03 |
| 10 | 8  | 2  | 9  | 8  | 1  | 19153.361 | 0.138E-03 |
| 10 | 7  | 4  | 9  | 7  | 3  | 19167.123 | 0.237E-03 |
| 10 | 7  | 3  | 9  | 7  | 2  | 19167.123 | 0.237E-03 |
| 10 | 6  | 5  | 9  | 6  | 4  | 19188.630 | 0.351E-03 |
| 10 | 6  | 4  | 9  | 6  | 3  | 19188.664 | 0.351E-03 |
| 11 | 0  | 11 | 10 | 0  | 10 | 19194.115 | 0.891E-03 |
| 10 | 5  | 6  | 9  | 5  | 5  | 19224.534 | 0.474E-03 |
| 10 | 5  | 5  | 9  | 5  | 4  | 19226.152 | 0.474E-03 |
| 10 | 3  | 8  | 9  | 3  | 7  | 19227.744 | 0.703E-03 |
| 10 | 4  | 7  | 9  | 4  | 6  | 19276.502 | 0.597E-03 |
| 10 | 4  | 6  | 9  | 4  | 5  | 19318.063 | 0.599E-03 |
| 10 | 1  | 9  | 9  | 1  | 8  | 19382.577 | 0.845E-03 |
| 10 | 3  | 7  | 9  | 3  | 6  | 19694.110 | 0.734E-03 |
| 17 | 2  | 15 | 17 | 2  | 16 | 19925.355 | 0.157E-04 |
| 10 | 2  | 8  | 9  | 2  | 7  | 20173.561 | 0.855E-03 |
| 11 | 2  | 10 | 10 | 2  | 9  | 20454.763 | 0.908E-03 |
| 12 | 1  | 12 | 11 | 1  | 11 | 20801.433 | 0.103E-02 |
| 12 | 0  | 12 | 11 | 0  | 11 | 20847.591 | 0.104E-02 |
| 21 | 3  | 18 | 21 | 3  | 19 | 21037.096 | 0.142E-04 |
| 11 | 10 | 2  | 10 | 10 | 1  | 21057.568 | 0.512E-04 |
| 11 | 10 | 1  | 10 | 10 | 0  | 21057.568 | 0.512E-04 |
| 11 | 9  | 3  | 10 | 9  | 2  | 21066.416 | 0.124E-03 |
| 11 | 9  | 2  | 10 | 9  | 1  | 21066.416 | 0.124E-03 |
| 11 | 8  | 4  | 10 | 8  | 3  | 21078.867 | 0.219E-03 |
| 11 | 8  | 3  | 10 | 8  | 2  | 21078.867 | 0.219E-03 |
| 11 | 1  | 10 | 10 | 1  | 9  | 21082.804 | 0.100E-02 |
| 11 | 7  | 5  | 10 | 7  | 4  | 21097.206 | 0.334E-03 |
| 11 | 7  | 4  | 10 | 7  | 3  | 21097.208 | 0.334E-03 |
| 11 | 6  | 6  | 10 | 6  | 5  | 21125.881 | 0.466E-03 |
| 11 | 6  | 5  | 10 | 6  | 4  | 21125.989 | 0.466E-03 |
| 11 | 3  | 9  | 10 | 3  | 8  | 21131.350 | 0.862E-03 |
| 11 | 5  | 7  | 10 | 5  | 6  | 21173.106 | 0.607E-03 |
| 11 | 5  | 6  | 10 | 5  | 5  | 21177.108 | 0.607E-03 |
| 11 | 4  | 8  | 10 | 4  | 7  | 21232.250 | 0.747E-03 |
| 11 | 4  | 7  | 10 | 4  | 6  | 21313.159 | 0.752E-03 |
| 11 | 3  | 8  | 10 | 3  | 7  | 21819.847 | 0.913E-03 |
| 18 | 2  | 16 | 18 | 2  | 17 | 22003.191 | 0.154E-04 |
| 11 | 2  | 9  | 10 | 2  | 8  | 22169.496 | 0.103E-02 |
| 12 | 2  | 11 | 11 | 2  | 10 | 22210.527 | 0.106E-02 |
| 13 | 1  | 13 | 12 | 1  | 12 | 22475.780 | 0.117E-02 |
| 13 | 0  | 13 | 12 | 0  | 12 | 22505.216 | 0.119E-02 |
| 12 | 1  | 11 | 11 | 1  | 10 | 22738.728 | 0.114E-02 |
| 12 | 11 | 2  | 11 | 11 | 1  | 22971.154 | 0.422E-04 |
| 12 | 11 | 1  | 11 | 11 | 0  | 22971.154 | 0.422E-04 |
| 12 | 10 | 3  | 11 | 10 | 2  | 22979.617 | 0.105E-03 |
| 12 | 10 | 2  | 11 | 10 | 1  | 22979.617 | 0.105E-03 |
| 12 | 9  | 4  | 11 | 9  | 3  | 22991.110 | 0.192E-03 |
| 12 | 9  | 3  | 11 | 9  | 2  | 22991.110 | 0.192E-03 |
| 12 | 8  | 5  | 11 | 8  | 4  | 23007.290 | 0.302E-03 |
| 12 | 8  | 4  | 11 | 8  | 3  | 23007.290 | 0.302E-03 |
| 12 | 3  | 10 | 11 | 3  | 9  | 23018.270 | 0.102E-02 |
| 12 | 7  | 6  | 11 | 7  | 5  | 23031.141 | 0.434E-03 |
| 12 | 7  | 5  | 11 | 7  | 4  | 23031.147 | 0.434E-03 |
| 12 | 6  | 7  | 11 | 6  | 6  | 23068.431 | 0.582E-03 |
| 12 | 6  | 6  | 11 | 6  | 5  | 23068.734 | 0.582E-03 |
| 12 | 5  | 8  | 11 | 5  | 7  | 23128.509 | 0.740E-03 |
| 12 | 5  | 7  | 11 | 5  | 6  | 23137.527 | 0.740E-03 |
| 12 | 4  | 9  | 11 | 4  | 8  | 23189.565 | 0.895E-03 |
| 12 | 4  | 8  | 11 | 4  | 7  | 23335.760 | 0.905E-03 |
| 22 | 3  | 19 | 22 | 3  | 20 | 23414.291 | 0.138E-04 |
| 13 | 2  | 12 | 12 | 2  | 11 | 23947.837 | 0.120E-02 |
| 12 | 3  | 9  | 11 | 3  | 8  | 23965.139 | 0.109E-02 |
| 19 | 2  | 17 | 19 | 2  | 18 | 23999.204 | 0.147E-04 |
| 12 | 2  | 10 | 11 | 2  | 9  | 24114.473 | 0.120E-02 |
| 14 | 1  | 14 | 13 | 1  | 13 | 24147.463 | 0.131E-02 |
| 14 | 0  | 14 | 13 | 0  | 13 | 24165.931 | 0.132E-02 |
| 13 | 1  | 12 | 12 | 1  | 11 | 24367.596 | 0.127E-02 |
| 13 | 12 | 2  | 12 | 12 | 1  | 24884.762 | 0.332E-04 |
| 13 | 12 | 1  | 12 | 12 | 0  | 24884.762 | 0.332E-04 |
| 13 | 3  | 11 | 12 | 3  | 10 | 24885.574 | 0.116E-02 |

|    |    |    |    |    |    |           |           |
|----|----|----|----|----|----|-----------|-----------|
| 13 | 11 | 3  | 12 | 11 | 2  | 24892.920 | 0.852E-04 |
| 13 | 11 | 2  | 12 | 11 | 1  | 24892.920 | 0.852E-04 |
| 13 | 10 | 4  | 12 | 10 | 3  | 24903.686 | 0.160E-03 |
| 13 | 10 | 3  | 12 | 10 | 2  | 24903.686 | 0.160E-03 |
| 13 | 9  | 5  | 12 | 9  | 4  | 24918.309 | 0.259E-03 |
| 13 | 9  | 4  | 12 | 9  | 3  | 24918.309 | 0.259E-03 |
| 13 | 8  | 6  | 12 | 8  | 5  | 24938.906 | 0.383E-03 |
| 13 | 8  | 5  | 12 | 8  | 4  | 24938.907 | 0.383E-03 |
| 13 | 7  | 7  | 12 | 7  | 6  | 24969.300 | 0.530E-03 |
| 13 | 7  | 6  | 12 | 7  | 5  | 24969.319 | 0.530E-03 |
| 13 | 6  | 8  | 12 | 6  | 7  | 25016.766 | 0.694E-03 |
| 13 | 6  | 7  | 12 | 6  | 6  | 25017.538 | 0.694E-03 |
| 13 | 5  | 9  | 12 | 5  | 8  | 25090.697 | 0.867E-03 |
| 13 | 5  | 8  | 12 | 5  | 7  | 25109.508 | 0.868E-03 |
| 13 | 4  | 10 | 12 | 4  | 9  | 25145.273 | 0.103E-02 |
| 13 | 4  | 9  | 12 | 4  | 8  | 25392.470 | 0.105E-02 |
| 14 | 2  | 13 | 13 | 2  | 12 | 25668.791 | 0.132E-02 |
| 23 | 3  | 20 | 23 | 3  | 21 | 25694.974 | 0.129E-04 |
| 15 | 1  | 15 | 14 | 1  | 14 | 25817.371 | 0.142E-02 |
| 15 | 0  | 15 | 14 | 0  | 14 | 25828.805 | 0.143E-02 |
| 20 | 2  | 18 | 20 | 2  | 19 | 25917.071 | 0.137E-04 |
| 14 | 1  | 13 | 13 | 1  | 12 | 25986.056 | 0.138E-02 |
| 13 | 2  | 11 | 12 | 2  | 10 | 26000.856 | 0.135E-02 |
| 13 | 3  | 10 | 12 | 3  | 9  | 26109.214 | 0.126E-02 |
| 14 | 3  | 12 | 13 | 3  | 11 | 26731.107 | 0.128E-02 |
| 14 | 13 | 2  | 13 | 13 | 1  | 26798.386 | 0.249E-04 |
| 14 | 13 | 1  | 13 | 13 | 0  | 26798.386 | 0.249E-04 |
| 14 | 12 | 3  | 13 | 12 | 2  | 26806.298 | 0.657E-04 |
| 14 | 12 | 2  | 13 | 12 | 1  | 26806.298 | 0.657E-04 |
| 14 | 11 | 4  | 13 | 11 | 3  | 26816.491 | 0.127E-03 |
| 14 | 11 | 3  | 13 | 11 | 2  | 26816.491 | 0.127E-03 |
| 14 | 10 | 5  | 13 | 10 | 4  | 26829.945 | 0.211E-03 |
| 14 | 10 | 4  | 13 | 10 | 3  | 26829.945 | 0.211E-03 |
| 14 | 9  | 6  | 13 | 9  | 5  | 26848.227 | 0.322E-03 |
| 14 | 9  | 5  | 13 | 9  | 4  | 26848.227 | 0.322E-03 |
| 14 | 8  | 7  | 13 | 8  | 6  | 26873.996 | 0.458E-03 |
| 14 | 8  | 6  | 13 | 8  | 5  | 26873.997 | 0.458E-03 |
| 14 | 7  | 8  | 13 | 7  | 7  | 26912.065 | 0.618E-03 |
| 14 | 7  | 7  | 13 | 7  | 6  | 26912.120 | 0.618E-03 |
| 14 | 6  | 9  | 13 | 6  | 8  | 26971.338 | 0.795E-03 |
| 14 | 6  | 8  | 13 | 6  | 7  | 26973.151 | 0.795E-03 |
| 14 | 5  | 10 | 13 | 5  | 9  | 27059.188 | 0.981E-03 |
| 14 | 4  | 11 | 13 | 4  | 10 | 27095.612 | 0.116E-02 |
| 14 | 5  | 9  | 13 | 5  | 8  | 27095.920 | 0.983E-03 |
| 15 | 2  | 14 | 14 | 2  | 13 | 27375.871 | 0.142E-02 |
| 16 | 1  | 16 | 15 | 1  | 15 | 27486.128 | 0.151E-02 |
| 14 | 4  | 10 | 13 | 4  | 9  | 27488.599 | 0.119E-02 |
| 16 | 0  | 16 | 15 | 0  | 15 | 27493.130 | 0.152E-02 |
| 15 | 1  | 14 | 14 | 1  | 13 | 27605.817 | 0.147E-02 |
| 21 | 2  | 19 | 21 | 2  | 20 | 27767.819 | 0.124E-04 |
| 14 | 2  | 12 | 13 | 2  | 11 | 27822.435 | 0.146E-02 |
| 24 | 3  | 21 | 24 | 3  | 22 | 27866.988 | 0.117E-04 |
| 14 | 3  | 11 | 13 | 3  | 10 | 28231.114 | 0.140E-02 |
| 15 | 3  | 13 | 14 | 3  | 12 | 28553.595 | 0.138E-02 |
| 15 | 14 | 2  | 14 | 14 | 1  | 28712.024 | 0.179E-04 |
| 15 | 14 | 1  | 14 | 14 | 0  | 28712.024 | 0.179E-04 |
| 15 | 13 | 3  | 14 | 13 | 2  | 28719.730 | 0.485E-04 |
| 15 | 13 | 2  | 14 | 13 | 1  | 28719.730 | 0.485E-04 |
| 15 | 12 | 4  | 14 | 12 | 3  | 28729.464 | 0.961E-04 |
| 15 | 12 | 3  | 14 | 12 | 2  | 28729.464 | 0.961E-04 |
| 15 | 11 | 5  | 14 | 11 | 4  | 28742.007 | 0.165E-03 |
| 15 | 11 | 4  | 14 | 11 | 3  | 28742.007 | 0.165E-03 |
| 15 | 10 | 6  | 14 | 10 | 5  | 28758.567 | 0.258E-03 |
| 15 | 10 | 5  | 14 | 10 | 4  | 28758.567 | 0.258E-03 |
| 15 | 9  | 7  | 14 | 9  | 6  | 28781.083 | 0.378E-03 |
| 15 | 9  | 6  | 14 | 9  | 5  | 28781.083 | 0.378E-03 |
| 15 | 8  | 8  | 14 | 8  | 7  | 28812.848 | 0.525E-03 |
| 15 | 8  | 7  | 14 | 8  | 6  | 28812.851 | 0.525E-03 |
| 15 | 7  | 9  | 14 | 7  | 8  | 28859.827 | 0.695E-03 |
| 15 | 7  | 8  | 14 | 7  | 7  | 28859.970 | 0.695E-03 |
| 15 | 6  | 10 | 14 | 6  | 9  | 28932.533 | 0.882E-03 |
| 15 | 6  | 9  | 14 | 6  | 8  | 28936.502 | 0.882E-03 |
| 15 | 5  | 11 | 14 | 5  | 10 | 29032.924 | 0.108E-02 |
| 15 | 4  | 12 | 14 | 4  | 11 | 29036.501 | 0.126E-02 |
| 16 | 2  | 15 | 15 | 2  | 14 | 29071.671 | 0.150E-02 |
| 15 | 5  | 10 | 14 | 5  | 9  | 29100.614 | 0.108E-02 |
| 17 | 1  | 17 | 16 | 1  | 16 | 29154.159 | 0.158E-02 |

|    |   |    |    |   |    |           |           |
|----|---|----|----|---|----|-----------|-----------|
| 17 | 0 | 17 | 16 | 0 | 16 | 29158.408 | 0.158E-02 |
| 16 | 1 | 15 | 15 | 1 | 14 | 29232.777 | 0.154E-02 |
| 22 | 2 | 20 | 22 | 2 | 21 | 29564.859 | 0.111E-04 |
| 15 | 2 | 13 | 14 | 2 | 12 | 29576.798 | 0.155E-02 |
| 15 | 4 | 11 | 14 | 4 | 10 | 29625.341 | 0.130E-02 |
| 25 | 3 | 22 | 25 | 3 | 23 | 29933.388 | 0.104E-04 |

### N1AC-5: b-type transitions ( $J''=0-28$ )

| J' | Ka' | Kc' | $\leftarrow$ | J'' | Ka'' | Kc'' | Frequency<br>(MHz) | logarithm<br>of intensity |
|----|-----|-----|--------------|-----|------|------|--------------------|---------------------------|
| 13 | 3   | 10  |              | 13  | 2    | 11   | 10061.093          | 0.120E-03                 |
| 11 | 3   | 8   |              | 11  | 2    | 9    | 10102.069          | 0.129E-03                 |
| 16 | 4   | 12  |              | 15  | 5    | 11   | 10114.279          | 0.232E-04                 |
| 19 | 5   | 14  |              | 18  | 6    | 13   | 10136.519          | 0.147E-04                 |
| 15 | 2   | 13  |              | 16  | 1    | 16   | 10171.344          | 0.491E-04                 |
| 13 | 3   | 10  |              | 12  | 4    | 9    | 10186.102          | 0.326E-04                 |
| 21 | 3   | 18  |              | 22  | 2    | 21   | 10244.072          | 0.214E-04                 |
| 10 | 3   | 7   |              | 10  | 2    | 8    | 10451.718          | 0.139E-03                 |
| 14 | 3   | 11  |              | 14  | 2    | 12   | 10469.771          | 0.123E-03                 |
| 5  | 1   | 5   |              | 4   | 0    | 4    | 10494.611          | 0.138E-03                 |
| 6  | 2   | 5   |              | 6   | 1    | 6    | 10502.717          | 0.129E-03                 |
| 9  | 1   | 8   |              | 9   | 0    | 9    | 10544.072          | 0.325E-03                 |
| 25 | 7   | 19  |              | 24  | 8    | 16   | 10572.484          | 0.437E-05                 |
| 12 | 2   | 10  |              | 12  | 1    | 11   | 10613.999          | 0.150E-03                 |
| 20 | 5   | 16  |              | 19  | 6    | 13   | 10828.711          | 0.154E-04                 |
| 9  | 3   | 6   |              | 9   | 2    | 7    | 10931.170          | 0.150E-03                 |
| 11 | 7   | 5   |              | 12  | 6    | 6    | 10934.163          | 0.106E-04                 |
| 11 | 7   | 4   |              | 12  | 6    | 7    | 10934.621          | 0.106E-04                 |
| 18 | 4   | 15  |              | 17  | 5    | 12   | 10936.091          | 0.244E-04                 |
| 8  | 1   | 7   |              | 7   | 2    | 6    | 11019.632          | 0.535E-04                 |
| 15 | 3   | 12  |              | 15  | 2    | 13   | 11206.775          | 0.130E-03                 |
| 7  | 2   | 6   |              | 7   | 1    | 7    | 11395.393          | 0.166E-03                 |
| 8  | 3   | 5   |              | 8   | 2    | 6    | 11463.242          | 0.158E-03                 |
| 2  | 2   | 1   |              | 1   | 1    | 0    | 11570.486          | 0.894E-04                 |
| 7  | 0   | 7   |              | 6   | 1    | 6    | 11672.798          | 0.154E-03                 |
| 2  | 2   | 0   |              | 1   | 1    | 1    | 11828.167          | 0.934E-04                 |
| 6  | 1   | 6   |              | 5   | 0    | 5    | 11875.795          | 0.196E-03                 |
| 7  | 3   | 4   |              | 7   | 2    | 5    | 11974.752          | 0.159E-03                 |
| 13 | 2   | 11  |              | 13  | 1    | 12   | 12247.259          | 0.192E-03                 |
| 16 | 3   | 13  |              | 16  | 2    | 14   | 12283.439          | 0.144E-03                 |
| 16 | 2   | 14  |              | 17  | 1    | 17   | 12285.411          | 0.667E-04                 |
| 19 | 4   | 16  |              | 18  | 5    | 13   | 12287.707          | 0.283E-04                 |
| 13 | 8   | 6   |              | 14  | 7    | 7    | 12315.997          | 0.106E-04                 |
| 13 | 8   | 5   |              | 14  | 7    | 8    | 12316.081          | 0.106E-04                 |
| 25 | 4   | 22  |              | 24  | 5    | 19   | 12351.983          | 0.126E-04                 |
| 10 | 1   | 9   |              | 10  | 0    | 10   | 12381.053          | 0.454E-03                 |
| 6  | 3   | 3   |              | 6   | 2    | 4    | 12408.247          | 0.152E-03                 |
| 8  | 2   | 7   |              | 8   | 1    | 8    | 12412.872          | 0.210E-03                 |
| 22 | 3   | 19  |              | 23  | 2    | 22   | 12564.251          | 0.278E-04                 |
| 5  | 3   | 2   |              | 5   | 2    | 3    | 12731.322          | 0.134E-03                 |
| 21 | 5   | 17  |              | 20  | 6    | 14   | 12741.711          | 0.192E-04                 |
| 11 | 2   | 9   |              | 10  | 3    | 8    | 12788.673          | 0.653E-04                 |
| 20 | 5   | 15  |              | 19  | 6    | 14   | 12876.985          | 0.217E-04                 |
| 10 | 7   | 4   |              | 11  | 6    | 5    | 12905.691          | 0.119E-04                 |
| 10 | 7   | 3   |              | 11  | 6    | 6    | 12905.844          | 0.119E-04                 |
| 23 | 6   | 17  |              | 22  | 7    | 16   | 12930.001          | 0.117E-04                 |
| 4  | 3   | 1   |              | 4   | 2    | 2    | 12939.877          | 0.104E-03                 |
| 3  | 3   | 0   |              | 3   | 2    | 1    | 13052.841          | 0.608E-04                 |
| 17 | 4   | 13  |              | 16  | 5    | 12   | 13092.154          | 0.370E-04                 |
| 3  | 3   | 1   |              | 3   | 2    | 2    | 13134.523          | 0.616E-04                 |
| 18 | 4   | 14  |              | 18  | 3    | 15   | 13161.350          | 0.122E-03                 |
| 4  | 3   | 2   |              | 4   | 2    | 3    | 13178.561          | 0.108E-03                 |
| 17 | 4   | 13  |              | 17  | 3    | 14   | 13200.647          | 0.138E-03                 |
| 3  | 2   | 2   |              | 2   | 1    | 1    | 13237.556          | 0.127E-03                 |
| 5  | 3   | 3   |              | 5   | 2    | 4    | 13265.255          | 0.145E-03                 |
| 14 | 3   | 11  |              | 13  | 4    | 10   | 13271.943          | 0.553E-04                 |
| 7  | 1   | 7   |              | 6   | 0    | 6    | 13273.363          | 0.265E-03                 |
| 20 | 4   | 17  |              | 19  | 5    | 14   | 13348.334          | 0.302E-04                 |
| 6  | 3   | 4   |              | 6   | 2    | 5    | 13412.095          | 0.178E-03                 |
| 19 | 4   | 15  |              | 19  | 3    | 16   | 13459.426          | 0.113E-03                 |
| 24 | 4   | 21  |              | 23  | 5    | 18   | 13495.228          | 0.179E-04                 |
| 16 | 4   | 12  |              | 16  | 3    | 13   | 13527.847          | 0.160E-03                 |
| 9  | 2   | 8   |              | 9   | 1    | 9    | 13546.937          | 0.260E-03                 |

|    |   |    |    |   |    |           |           |
|----|---|----|----|---|----|-----------|-----------|
| 9  | 1 | 8  | 8  | 2 | 7  | 13579.865 | 0.890E-04 |
| 8  | 0 | 8  | 7  | 1 | 7  | 13595.309 | 0.228E-03 |
| 7  | 3 | 5  | 7  | 2 | 6  | 13636.811 | 0.208E-03 |
| 17 | 3 | 14 | 17 | 2 | 15 | 13689.741 | 0.162E-03 |
| 8  | 3 | 6  | 8  | 2 | 7  | 13956.083 | 0.235E-03 |
| 24 | 6 | 19 | 23 | 7 | 16 | 14020.165 | 0.119E-04 |
| 3  | 2 | 1  | 2  | 1 | 2  | 14043.251 | 0.143E-03 |
| 21 | 4 | 18 | 20 | 5 | 15 | 14051.390 | 0.298E-04 |
| 15 | 4 | 11 | 15 | 3 | 12 | 14076.051 | 0.189E-03 |
| 14 | 2 | 12 | 14 | 1 | 13 | 14083.638 | 0.240E-03 |
| 20 | 4 | 16 | 20 | 3 | 17 | 14126.219 | 0.108E-03 |
| 23 | 4 | 20 | 22 | 5 | 17 | 14158.274 | 0.230E-04 |
| 11 | 1 | 10 | 11 | 0 | 11 | 14269.742 | 0.600E-03 |
| 12 | 8 | 5  | 13 | 7 | 6  | 14289.211 | 0.124E-04 |
| 12 | 8 | 4  | 13 | 7 | 7  | 14289.239 | 0.124E-04 |
| 22 | 4 | 19 | 21 | 5 | 16 | 14336.390 | 0.273E-04 |
| 17 | 2 | 15 | 18 | 1 | 18 | 14372.615 | 0.839E-04 |
| 9  | 3 | 7  | 9  | 2 | 8  | 14384.390 | 0.262E-03 |
| 22 | 5 | 18 | 21 | 6 | 15 | 14528.081 | 0.220E-04 |
| 8  | 1 | 8  | 7  | 0 | 7  | 14712.097 | 0.343E-03 |
| 14 | 4 | 10 | 14 | 3 | 11 | 14764.511 | 0.223E-03 |
| 4  | 2 | 3  | 3  | 1 | 2  | 14781.910 | 0.172E-03 |
| 10 | 2 | 9  | 10 | 1 | 10 | 14786.421 | 0.316E-03 |
| 23 | 3 | 20 | 24 | 2 | 23 | 14805.609 | 0.331E-04 |
| 9  | 7 | 3  | 10 | 6 | 4  | 14864.557 | 0.115E-04 |
| 9  | 7 | 2  | 10 | 6 | 5  | 14864.602 | 0.115E-04 |
| 10 | 3 | 8  | 10 | 2 | 9  | 14933.079 | 0.289E-03 |
| 21 | 4 | 17 | 21 | 3 | 18 | 15173.610 | 0.107E-03 |
| 18 | 3 | 15 | 18 | 2 | 16 | 15390.498 | 0.183E-03 |
| 9  | 0 | 9  | 8  | 1 | 8  | 15448.666 | 0.313E-03 |
| 13 | 4 | 9  | 13 | 3 | 10 | 15507.026 | 0.259E-03 |
| 11 | 3 | 9  | 11 | 2 | 10 | 15609.666 | 0.316E-03 |
| 24 | 6 | 18 | 23 | 7 | 17 | 15623.528 | 0.147E-04 |
| 14 | 9 | 6  | 15 | 8 | 7  | 15671.848 | 0.115E-04 |
| 14 | 9 | 5  | 15 | 8 | 8  | 15671.853 | 0.115E-04 |
| 12 | 2 | 10 | 11 | 3 | 9  | 15771.796 | 0.102E-03 |
| 21 | 5 | 16 | 20 | 6 | 15 | 15834.862 | 0.294E-04 |
| 15 | 2 | 13 | 15 | 1 | 14 | 16054.619 | 0.291E-03 |
| 25 | 6 | 20 | 24 | 7 | 17 | 16072.206 | 0.134E-04 |
| 10 | 1 | 9  | 9  | 2 | 8  | 16079.749 | 0.132E-03 |
| 11 | 2 | 10 | 11 | 1 | 11 | 16117.968 | 0.375E-03 |
| 23 | 5 | 19 | 22 | 6 | 16 | 16136.165 | 0.237E-04 |
| 12 | 1 | 11 | 12 | 0 | 12 | 16160.879 | 0.753E-03 |
| 23 | 5 | 18 | 23 | 4 | 19 | 16201.003 | 0.792E-04 |
| 9  | 1 | 9  | 8  | 0 | 8  | 16201.634 | 0.431E-03 |
| 5  | 2 | 4  | 4  | 1 | 3  | 16206.447 | 0.222E-03 |
| 12 | 4 | 8  | 12 | 3 | 9  | 16223.771 | 0.294E-03 |
| 11 | 8 | 4  | 12 | 7 | 5  | 16251.240 | 0.130E-04 |
| 11 | 8 | 3  | 12 | 7 | 6  | 16251.249 | 0.130E-04 |
| 18 | 4 | 14 | 17 | 5 | 13 | 16282.035 | 0.535E-04 |
| 24 | 5 | 19 | 24 | 4 | 20 | 16377.182 | 0.671E-04 |
| 22 | 5 | 17 | 22 | 4 | 18 | 16393.050 | 0.966E-04 |
| 18 | 2 | 16 | 19 | 1 | 19 | 16400.460 | 0.991E-04 |
| 12 | 3 | 10 | 12 | 2 | 11 | 16417.409 | 0.343E-03 |
| 4  | 2 | 2  | 3  | 1 | 3  | 16471.463 | 0.215E-03 |
| 15 | 3 | 12 | 14 | 4 | 11 | 16490.132 | 0.833E-04 |
| 22 | 4 | 18 | 22 | 3 | 19 | 16590.606 | 0.109E-03 |
| 11 | 4 | 7  | 11 | 3 | 8  | 16853.150 | 0.322E-03 |
| 21 | 5 | 16 | 21 | 4 | 17 | 16896.164 | 0.121E-03 |
| 24 | 3 | 21 | 25 | 2 | 24 | 16949.822 | 0.367E-04 |
| 25 | 5 | 20 | 25 | 4 | 21 | 16957.915 | 0.589E-04 |
| 10 | 0 | 10 | 9  | 1 | 9  | 17245.633 | 0.405E-03 |
| 19 | 3 | 16 | 19 | 2 | 17 | 17326.709 | 0.204E-03 |
| 13 | 3 | 11 | 13 | 2 | 12 | 17355.146 | 0.370E-03 |
| 10 | 4 | 6  | 10 | 3 | 7  | 17359.837 | 0.339E-03 |
| 24 | 5 | 20 | 23 | 6 | 17 | 17505.533 | 0.240E-04 |
| 6  | 2 | 5  | 5  | 1 | 4  | 17517.802 | 0.274E-03 |
| 12 | 2 | 11 | 12 | 1 | 12 | 17527.063 | 0.436E-03 |
| 20 | 5 | 15 | 20 | 4 | 16 | 17634.076 | 0.153E-03 |
| 13 | 9 | 5  | 14 | 8 | 6  | 17636.472 | 0.127E-04 |
| 13 | 9 | 4  | 14 | 8 | 7  | 17636.474 | 0.127E-04 |
| 9  | 4 | 5  | 9  | 3 | 6  | 17735.884 | 0.342E-03 |
| 10 | 1 | 10 | 9  | 0 | 9  | 17739.534 | 0.524E-03 |
| 26 | 5 | 21 | 26 | 4 | 22 | 17957.547 | 0.536E-04 |
| 8  | 4 | 4  | 8  | 3 | 5  | 17994.511 | 0.329E-03 |
| 13 | 1 | 12 | 13 | 0 | 13 | 18023.259 | 0.904E-03 |
| 26 | 6 | 21 | 25 | 7 | 18 | 18034.168 | 0.141E-04 |



|    |    |    |    |   |    |           |           |
|----|----|----|----|---|----|-----------|-----------|
| 16 | 2  | 14 | 16 | 1 | 15 | 18090.068 | 0.340E-03 |
| 7  | 4  | 3  | 7  | 3 | 4  | 18160.042 | 0.300E-03 |
| 10 | 8  | 3  | 11 | 7 | 4  | 18203.521 | 0.119E-04 |
| 10 | 8  | 2  | 11 | 7 | 5  | 18203.523 | 0.119E-04 |
| 6  | 4  | 2  | 6  | 3 | 3  | 18258.763 | 0.255E-03 |
| 8  | 4  | 5  | 8  | 3 | 6  | 18294.694 | 0.340E-03 |
| 7  | 4  | 4  | 7  | 3 | 5  | 18301.265 | 0.305E-03 |
| 9  | 4  | 6  | 9  | 3 | 7  | 18308.421 | 0.365E-03 |
| 5  | 4  | 1  | 5  | 3 | 2  | 18313.394 | 0.193E-03 |
| 6  | 4  | 3  | 6  | 3 | 4  | 18316.653 | 0.257E-03 |
| 5  | 4  | 2  | 5  | 3 | 3  | 18333.024 | 0.193E-03 |
| 23 | 4  | 19 | 23 | 3 | 20 | 18340.125 | 0.112E-03 |
| 4  | 4  | 0  | 4  | 3 | 1  | 18341.083 | 0.110E-03 |
| 4  | 4  | 1  | 4  | 3 | 2  | 18346.048 | 0.110E-03 |
| 19 | 2  | 17 | 20 | 1 | 20 | 18354.944 | 0.111E-03 |
| 10 | 4  | 7  | 10 | 3 | 8  | 18357.179 | 0.380E-03 |
| 14 | 3  | 12 | 14 | 2 | 13 | 18417.462 | 0.397E-03 |
| 11 | 4  | 8  | 11 | 3 | 9  | 18458.078 | 0.387E-03 |
| 11 | 1  | 10 | 10 | 2 | 9  | 18483.497 | 0.181E-03 |
| 19 | 5  | 14 | 19 | 4 | 15 | 18516.774 | 0.193E-03 |
| 25 | 6  | 19 | 24 | 7 | 18 | 18518.937 | 0.176E-04 |
| 29 | 5  | 25 | 28 | 6 | 22 | 18519.567 | 0.103E-04 |
| 25 | 5  | 21 | 24 | 6 | 18 | 18569.108 | 0.229E-04 |
| 12 | 4  | 9  | 12 | 3 | 10 | 18629.372 | 0.390E-03 |
| 7  | 2  | 6  | 6  | 1 | 5  | 18727.938 | 0.325E-03 |
| 13 | 2  | 11 | 12 | 3 | 10 | 18754.382 | 0.145E-03 |
| 3  | 3  | 1  | 2  | 2 | 0  | 18842.449 | 0.367E-03 |
| 3  | 3  | 0  | 2  | 2 | 1  | 18859.747 | 0.368E-03 |
| 13 | 4  | 10 | 13 | 3 | 11 | 18889.071 | 0.389E-03 |
| 25 | 3  | 22 | 26 | 2 | 25 | 18995.452 | 0.386E-04 |
| 13 | 2  | 12 | 13 | 1 | 13 | 18999.119 | 0.495E-03 |
| 11 | 0  | 11 | 10 | 1 | 10 | 19000.176 | 0.501E-03 |
| 15 | 10 | 6  | 16 | 9 | 7  | 19020.645 | 0.110E-04 |
| 15 | 10 | 5  | 16 | 9 | 8  | 19020.645 | 0.110E-04 |
| 22 | 5  | 17 | 21 | 6 | 16 | 19028.574 | 0.375E-04 |
| 5  | 2  | 3  | 4  | 1 | 4  | 19166.239 | 0.313E-03 |
| 28 | 6  | 22 | 28 | 5 | 23 | 19207.557 | 0.350E-04 |
| 29 | 6  | 23 | 29 | 5 | 24 | 19250.989 | 0.276E-04 |
| 14 | 4  | 11 | 14 | 3 | 12 | 19253.576 | 0.385E-03 |
| 26 | 5  | 22 | 25 | 6 | 19 | 19257.778 | 0.206E-04 |
| 28 | 5  | 24 | 27 | 6 | 21 | 19270.407 | 0.139E-04 |
| 11 | 1  | 11 | 10 | 0 | 10 | 19317.154 | 0.621E-03 |
| 27 | 5  | 22 | 27 | 4 | 23 | 19365.868 | 0.500E-04 |
| 20 | 3  | 17 | 20 | 2 | 18 | 19423.378 | 0.225E-03 |
| 18 | 5  | 13 | 18 | 4 | 14 | 19450.536 | 0.241E-03 |
| 27 | 5  | 23 | 26 | 6 | 20 | 19507.864 | 0.174E-04 |
| 27 | 6  | 21 | 27 | 5 | 22 | 19557.980 | 0.458E-04 |
| 12 | 9  | 4  | 13 | 8 | 5  | 19592.161 | 0.128E-04 |
| 12 | 9  | 3  | 13 | 8 | 6  | 19592.161 | 0.128E-04 |
| 15 | 3  | 13 | 15 | 2 | 14 | 19595.186 | 0.422E-03 |
| 19 | 4  | 15 | 18 | 5 | 14 | 19662.319 | 0.715E-04 |
| 30 | 6  | 24 | 30 | 5 | 25 | 19730.824 | 0.224E-04 |
| 15 | 4  | 12 | 15 | 3 | 13 | 19736.482 | 0.379E-03 |
| 16 | 3  | 13 | 15 | 4 | 12 | 19798.522 | 0.115E-03 |
| 14 | 1  | 13 | 14 | 0 | 14 | 19843.384 | 0.104E-02 |
| 8  | 2  | 7  | 7  | 1 | 6  | 19855.868 | 0.373E-03 |
| 27 | 6  | 22 | 26 | 7 | 19 | 19862.253 | 0.142E-04 |
| 17 | 2  | 15 | 17 | 1 | 16 | 20130.481 | 0.384E-03 |
| 20 | 2  | 18 | 21 | 1 | 21 | 20236.496 | 0.120E-03 |
| 26 | 6  | 20 | 26 | 5 | 21 | 20236.748 | 0.612E-04 |
| 16 | 4  | 13 | 16 | 3 | 14 | 20347.649 | 0.373E-03 |
| 17 | 5  | 12 | 17 | 4 | 13 | 20350.621 | 0.294E-03 |
| 24 | 4  | 20 | 24 | 3 | 21 | 20359.896 | 0.115E-03 |
| 14 | 2  | 13 | 14 | 1 | 14 | 20520.447 | 0.552E-03 |
| 4  | 3  | 2  | 3  | 2 | 1  | 20715.929 | 0.451E-03 |
| 12 | 0  | 12 | 11 | 1 | 11 | 20724.552 | 0.595E-03 |
| 12 | 1  | 11 | 11 | 2 | 10 | 20767.463 | 0.230E-03 |
| 4  | 3  | 1  | 3  | 2 | 2  | 20803.317 | 0.455E-03 |
| 16 | 3  | 14 | 16 | 2 | 15 | 20876.201 | 0.443E-03 |
| 12 | 1  | 12 | 11 | 0 | 11 | 20924.472 | 0.717E-03 |
| 9  | 2  | 8  | 8  | 1 | 7  | 20928.855 | 0.416E-03 |
| 26 | 3  | 23 | 27 | 2 | 26 | 20951.948 | 0.389E-04 |
| 14 | 10 | 5  | 15 | 9 | 6  | 20979.177 | 0.117E-04 |
| 14 | 10 | 4  | 15 | 9 | 7  | 20979.177 | 0.117E-04 |
| 17 | 4  | 14 | 17 | 3 | 15 | 21092.589 | 0.365E-03 |
| 28 | 5  | 23 | 28 | 4 | 24 | 21145.365 | 0.473E-04 |
| 16 | 5  | 11 | 16 | 4 | 12 | 21152.967 | 0.349E-03 |

|    |    |    |    |   |    |           |           |
|----|----|----|----|---|----|-----------|-----------|
| 25 | 6  | 19 | 25 | 5 | 20 | 21158.289 | 0.824E-04 |
| 28 | 6  | 23 | 27 | 7 | 20 | 21503.293 | 0.137E-04 |
| 11 | 9  | 3  | 12 | 8 | 4  | 21539.957 | 0.112E-04 |
| 11 | 9  | 2  | 12 | 8 | 5  | 21539.957 | 0.112E-04 |
| 21 | 3  | 18 | 21 | 2 | 19 | 21601.821 | 0.240E-03 |
| 15 | 1  | 14 | 15 | 0 | 15 | 21620.396 | 0.116E-02 |
| 26 | 6  | 20 | 25 | 7 | 19 | 21648.985 | 0.202E-04 |
| 14 | 2  | 12 | 13 | 3 | 11 | 21691.243 | 0.190E-03 |
| 15 | 5  | 10 | 15 | 4 | 11 | 21821.096 | 0.402E-03 |
| 18 | 4  | 15 | 18 | 3 | 16 | 21972.189 | 0.357E-03 |
| 10 | 2  | 9  | 9  | 1 | 8  | 21981.884 | 0.455E-03 |
| 21 | 2  | 19 | 22 | 1 | 22 | 22053.935 | 0.125E-03 |
| 15 | 2  | 14 | 15 | 1 | 15 | 22078.947 | 0.602E-03 |
| 18 | 2  | 16 | 18 | 1 | 17 | 22135.003 | 0.418E-03 |
| 6  | 2  | 4  | 5  | 1 | 5  | 22177.309 | 0.442E-03 |
| 24 | 6  | 18 | 24 | 5 | 19 | 22224.053 | 0.111E-03 |
| 17 | 3  | 15 | 17 | 2 | 16 | 22246.479 | 0.460E-03 |
| 14 | 5  | 9  | 14 | 4 | 10 | 22345.823 | 0.448E-03 |
| 13 | 0  | 13 | 12 | 1 | 12 | 22428.335 | 0.685E-03 |
| 23 | 5  | 18 | 22 | 6 | 17 | 22457.751 | 0.454E-04 |
| 5  | 3  | 3  | 4  | 2 | 2  | 22525.594 | 0.546E-03 |
| 13 | 1  | 13 | 12 | 0 | 12 | 22552.661 | 0.809E-03 |
| 25 | 4  | 21 | 25 | 3 | 22 | 22569.530 | 0.116E-03 |
| 13 | 5  | 8  | 13 | 4 | 9  | 22738.502 | 0.484E-03 |
| 5  | 3  | 2  | 4  | 2 | 3  | 22789.127 | 0.559E-03 |
| 27 | 3  | 24 | 28 | 2 | 27 | 22833.700 | 0.380E-04 |
| 29 | 6  | 24 | 28 | 7 | 21 | 22895.184 | 0.125E-04 |
| 13 | 1  | 12 | 12 | 2 | 11 | 22924.532 | 0.278E-03 |
| 13 | 10 | 4  | 14 | 9 | 5  | 22930.315 | 0.114E-04 |
| 13 | 10 | 3  | 14 | 9 | 6  | 22930.315 | 0.114E-04 |
| 19 | 4  | 16 | 19 | 3 | 17 | 22982.797 | 0.347E-03 |
| 12 | 5  | 7  | 12 | 4 | 8  | 23021.463 | 0.508E-03 |
| 11 | 2  | 10 | 10 | 1 | 9  | 23054.069 | 0.488E-03 |
| 17 | 3  | 14 | 16 | 4 | 13 | 23149.917 | 0.147E-03 |
| 20 | 4  | 16 | 19 | 5 | 15 | 23195.483 | 0.897E-04 |
| 15 | 5  | 11 | 15 | 4 | 12 | 23212.090 | 0.456E-03 |
| 14 | 5  | 10 | 14 | 4 | 11 | 23215.666 | 0.485E-03 |
| 11 | 5  | 6  | 11 | 4 | 7  | 23219.696 | 0.517E-03 |
| 29 | 5  | 24 | 29 | 4 | 25 | 23231.770 | 0.450E-04 |
| 13 | 5  | 9  | 13 | 4 | 10 | 23252.091 | 0.507E-03 |
| 16 | 5  | 12 | 16 | 4 | 13 | 23258.410 | 0.425E-03 |
| 12 | 5  | 8  | 12 | 4 | 9  | 23306.666 | 0.521E-03 |
| 23 | 6  | 17 | 23 | 5 | 18 | 23333.954 | 0.147E-03 |
| 10 | 5  | 5  | 10 | 4 | 6  | 23355.747 | 0.511E-03 |
| 16 | 1  | 15 | 16 | 0 | 16 | 23360.043 | 0.126E-02 |
| 11 | 5  | 7  | 11 | 4 | 8  | 23367.722 | 0.524E-03 |
| 17 | 5  | 13 | 17 | 4 | 14 | 23373.005 | 0.392E-03 |
| 10 | 5  | 6  | 10 | 4 | 7  | 23426.865 | 0.514E-03 |
| 9  | 5  | 4  | 9  | 4 | 5  | 23447.658 | 0.485E-03 |
| 9  | 5  | 5  | 9  | 4 | 6  | 23478.834 | 0.487E-03 |
| 8  | 5  | 3  | 8  | 4 | 4  | 23508.839 | 0.441E-03 |
| 8  | 5  | 4  | 8  | 4 | 5  | 23521.040 | 0.441E-03 |
| 7  | 5  | 2  | 7  | 4 | 3  | 23548.821 | 0.374E-03 |
| 7  | 5  | 3  | 7  | 4 | 4  | 23552.942 | 0.374E-03 |
| 6  | 5  | 1  | 6  | 4 | 2  | 23574.233 | 0.282E-03 |
| 18 | 5  | 14 | 18 | 4 | 15 | 23574.323 | 0.359E-03 |
| 6  | 5  | 2  | 6  | 4 | 3  | 23575.369 | 0.282E-03 |
| 5  | 5  | 0  | 5  | 4 | 1  | 23589.690 | 0.161E-03 |
| 5  | 5  | 1  | 5  | 4 | 2  | 23589.918 | 0.161E-03 |
| 16 | 2  | 15 | 16 | 1 | 16 | 23664.490 | 0.643E-03 |
| 18 | 3  | 16 | 18 | 2 | 17 | 23691.198 | 0.471E-03 |
| 22 | 3  | 19 | 22 | 2 | 20 | 23792.594 | 0.250E-03 |
| 22 | 2  | 20 | 23 | 1 | 23 | 23819.222 | 0.127E-03 |
| 19 | 5  | 15 | 19 | 4 | 16 | 23879.567 | 0.328E-03 |
| 30 | 6  | 25 | 29 | 7 | 22 | 23968.897 | 0.110E-04 |
| 19 | 2  | 17 | 19 | 1 | 18 | 24082.948 | 0.441E-03 |
| 20 | 4  | 17 | 20 | 3 | 18 | 24116.642 | 0.336E-03 |
| 14 | 0  | 14 | 13 | 1 | 13 | 24118.486 | 0.768E-03 |
| 12 | 2  | 11 | 11 | 1 | 10 | 24181.793 | 0.518E-03 |
| 14 | 1  | 14 | 13 | 0 | 13 | 24194.908 | 0.892E-03 |
| 6  | 3  | 4  | 5  | 2 | 3  | 24232.946 | 0.643E-03 |
| 20 | 5  | 16 | 20 | 4 | 17 | 24303.458 | 0.298E-03 |
| 22 | 6  | 16 | 22 | 5 | 17 | 24399.700 | 0.190E-03 |
| 15 | 2  | 13 | 14 | 3 | 12 | 24536.934 | 0.235E-03 |
| 28 | 3  | 25 | 29 | 2 | 28 | 24655.799 | 0.360E-04 |
| 30 | 7  | 23 | 30 | 6 | 24 | 24667.811 | 0.311E-04 |
| 6  | 3  | 3  | 5  | 2 | 4  | 24845.773 | 0.677E-03 |

|    |   |    |    |   |    |           |           |
|----|---|----|----|---|----|-----------|-----------|
| 21 | 5 | 17 | 21 | 4 | 18 | 24857.212 | 0.270E-03 |
| 26 | 4 | 22 | 26 | 3 | 23 | 24882.556 | 0.115E-03 |
| 14 | 1 | 13 | 13 | 2 | 12 | 24962.751 | 0.321E-03 |
| 27 | 6 | 21 | 26 | 7 | 20 | 25034.590 | 0.224E-04 |
| 17 | 1 | 16 | 17 | 0 | 17 | 25070.170 | 0.134E-02 |
| 19 | 3 | 17 | 19 | 2 | 18 | 25195.797 | 0.476E-03 |
| 17 | 2 | 16 | 17 | 1 | 17 | 25269.002 | 0.674E-03 |
| 21 | 6 | 15 | 21 | 5 | 16 | 25356.115 | 0.240E-03 |
| 21 | 4 | 18 | 21 | 3 | 19 | 25362.582 | 0.323E-03 |
| 13 | 2 | 12 | 12 | 1 | 11 | 25390.901 | 0.544E-03 |
| 7  | 2 | 5  | 6  | 1 | 6  | 25539.432 | 0.610E-03 |
| 30 | 5 | 25 | 30 | 4 | 26 | 25540.409 | 0.424E-04 |
| 23 | 2 | 21 | 24 | 1 | 24 | 25544.142 | 0.125E-03 |
| 22 | 5 | 18 | 22 | 4 | 19 | 25547.806 | 0.245E-03 |
| 15 | 0 | 15 | 14 | 1 | 14 | 25799.828 | 0.839E-03 |
| 7  | 3 | 5  | 6  | 2 | 4  | 25803.186 | 0.735E-03 |
| 15 | 1 | 15 | 14 | 0 | 14 | 25846.349 | 0.963E-03 |
| 29 | 7 | 22 | 29 | 6 | 23 | 25907.343 | 0.441E-04 |
| 23 | 3 | 20 | 23 | 2 | 21 | 25944.990 | 0.252E-03 |
| 20 | 2 | 18 | 20 | 1 | 19 | 25969.755 | 0.452E-03 |
| 4  | 4 | 1  | 3  | 3 | 0  | 26009.136 | 0.880E-03 |
| 4  | 4 | 0  | 3  | 3 | 1  | 26009.877 | 0.880E-03 |
| 24 | 5 | 19 | 23 | 6 | 18 | 26101.116 | 0.525E-04 |
| 20 | 6 | 14 | 20 | 5 | 15 | 26166.891 | 0.296E-03 |
| 23 | 5 | 19 | 23 | 4 | 20 | 26377.590 | 0.221E-03 |
| 29 | 3 | 26 | 30 | 2 | 29 | 26431.752 | 0.334E-04 |
| 18 | 3 | 15 | 17 | 4 | 14 | 26493.690 | 0.178E-03 |
| 14 | 2 | 13 | 13 | 1 | 12 | 26692.097 | 0.565E-03 |
| 22 | 4 | 19 | 22 | 3 | 20 | 26707.074 | 0.308E-03 |
| 20 | 3 | 18 | 20 | 2 | 19 | 26746.830 | 0.474E-03 |
| 18 | 1 | 17 | 18 | 0 | 18 | 26758.250 | 0.138E-02 |
| 19 | 6 | 13 | 19 | 5 | 14 | 26823.081 | 0.354E-03 |
| 21 | 4 | 17 | 20 | 5 | 16 | 26833.327 | 0.107E-03 |
| 18 | 2 | 17 | 18 | 1 | 18 | 26886.327 | 0.694E-03 |
| 15 | 1 | 14 | 14 | 2 | 13 | 26899.777 | 0.357E-03 |
| 7  | 3 | 4  | 6  | 2 | 5  | 27011.467 | 0.808E-03 |
| 28 | 7 | 21 | 28 | 6 | 22 | 27180.807 | 0.618E-04 |
| 8  | 3 | 6  | 7  | 2 | 5  | 27214.419 | 0.815E-03 |
| 27 | 4 | 23 | 27 | 3 | 24 | 27219.948 | 0.112E-03 |
| 24 | 2 | 22 | 25 | 1 | 25 | 27238.760 | 0.121E-03 |
| 16 | 2 | 14 | 15 | 3 | 13 | 27251.565 | 0.274E-03 |
| 18 | 6 | 12 | 18 | 5 | 13 | 27335.790 | 0.413E-03 |
| 24 | 5 | 20 | 24 | 4 | 21 | 27344.259 | 0.199E-03 |
| 16 | 0 | 16 | 15 | 1 | 15 | 27475.587 | 0.898E-03 |
| 16 | 1 | 16 | 15 | 0 | 15 | 27503.672 | 0.102E-02 |
| 17 | 6 | 11 | 17 | 5 | 12 | 27726.837 | 0.470E-03 |
| 21 | 2 | 19 | 21 | 1 | 20 | 27800.680 | 0.452E-03 |
| 21 | 6 | 16 | 21 | 5 | 17 | 27885.765 | 0.293E-03 |
| 20 | 6 | 15 | 20 | 5 | 16 | 27894.629 | 0.338E-03 |
| 5  | 4 | 2  | 4  | 3 | 1  | 27918.740 | 0.100E-02 |
| 5  | 4 | 1  | 4  | 3 | 2  | 27923.961 | 0.100E-02 |
| 22 | 6 | 17 | 22 | 5 | 18 | 27944.421 | 0.252E-03 |
| 19 | 6 | 14 | 19 | 5 | 15 | 27952.573 | 0.386E-03 |
| 16 | 6 | 10 | 16 | 5 | 11 | 28020.894 | 0.523E-03 |
| 24 | 3 | 21 | 24 | 2 | 22 | 28030.304 | 0.247E-03 |
| 18 | 6 | 13 | 18 | 5 | 14 | 28042.573 | 0.435E-03 |
| 15 | 2 | 14 | 14 | 1 | 13 | 28081.912 | 0.583E-03 |
| 23 | 6 | 18 | 23 | 5 | 19 | 28089.320 | 0.216E-03 |
| 23 | 4 | 20 | 23 | 3 | 21 | 28135.270 | 0.291E-03 |
| 17 | 6 | 12 | 17 | 5 | 13 | 28149.921 | 0.485E-03 |
| 15 | 6 | 9  | 15 | 5 | 10 | 28240.656 | 0.570E-03 |
| 16 | 6 | 11 | 16 | 5 | 12 | 28262.771 | 0.533E-03 |
| 21 | 3 | 19 | 21 | 2 | 20 | 28332.544 | 0.465E-03 |
| 24 | 6 | 19 | 24 | 5 | 20 | 28338.202 | 0.184E-03 |
| 15 | 6 | 10 | 15 | 5 | 11 | 28372.335 | 0.575E-03 |
| 27 | 7 | 20 | 27 | 6 | 21 | 28397.565 | 0.847E-04 |
| 14 | 6 | 8  | 14 | 5 | 9  | 28404.768 | 0.607E-03 |
| 19 | 1 | 18 | 19 | 0 | 19 | 28430.420 | 0.140E-02 |
| 25 | 5 | 21 | 25 | 4 | 22 | 28441.178 | 0.179E-03 |
| 9  | 3 | 7  | 8  | 2 | 6  | 28461.623 | 0.878E-03 |
| 14 | 6 | 9  | 14 | 5 | 10 | 28472.726 | 0.610E-03 |
| 19 | 2 | 18 | 19 | 1 | 19 | 28511.958 | 0.701E-03 |
| 13 | 6 | 7  | 13 | 5 | 8  | 28527.537 | 0.633E-03 |
| 13 | 6 | 8  | 13 | 5 | 9  | 28560.576 | 0.634E-03 |
| 12 | 6 | 6  | 12 | 5 | 7  | 28619.508 | 0.643E-03 |
| 12 | 6 | 7  | 12 | 5 | 8  | 28634.507 | 0.644E-03 |
| 28 | 6 | 22 | 27 | 7 | 21 | 28677.865 | 0.240E-04 |

|    |   |    |    |   |    |           |           |
|----|---|----|----|---|----|-----------|-----------|
| 11 | 6 | 5  | 11 | 5 | 6  | 28688.301 | 0.635E-03 |
| 11 | 6 | 6  | 11 | 5 | 7  | 28694.585 | 0.636E-03 |
| 25 | 6 | 20 | 25 | 5 | 21 | 28706.599 | 0.156E-03 |
| 10 | 6 | 4  | 10 | 5 | 5  | 28739.420 | 0.606E-03 |
| 10 | 6 | 5  | 10 | 5 | 6  | 28741.810 | 0.607E-03 |
| 16 | 1 | 15 | 15 | 2 | 14 | 28756.683 | 0.386E-03 |
| 9  | 6 | 3  | 9  | 5 | 4  | 28776.908 | 0.553E-03 |
| 9  | 6 | 4  | 9  | 5 | 5  | 28777.714 | 0.553E-03 |
| 8  | 6 | 2  | 8  | 5 | 3  | 28803.819 | 0.471E-03 |
| 8  | 6 | 3  | 8  | 5 | 4  | 28804.051 | 0.471E-03 |
| 7  | 6 | 1  | 7  | 5 | 2  | 28822.547 | 0.357E-03 |
| 7  | 6 | 2  | 7  | 5 | 3  | 28822.601 | 0.357E-03 |
| 6  | 6 | 0  | 6  | 5 | 1  | 28835.032 | 0.203E-03 |
| 6  | 6 | 1  | 6  | 5 | 2  | 28835.040 | 0.203E-03 |
| 25 | 2 | 23 | 26 | 1 | 26 | 28911.015 | 0.115E-03 |
| 17 | 0 | 17 | 16 | 1 | 16 | 29147.867 | 0.941E-03 |
| 17 | 1 | 17 | 16 | 0 | 16 | 29164.701 | 0.106E-02 |
| 26 | 6 | 21 | 26 | 5 | 22 | 29206.764 | 0.132E-03 |
| 8  | 2 | 6  | 7  | 1 | 7  | 29266.648 | 0.818E-03 |
| 8  | 3 | 5  | 7  | 2 | 6  | 29334.496 | 0.951E-03 |
| 26 | 7 | 19 | 26 | 6 | 20 | 29492.465 | 0.113E-03 |
| 28 | 4 | 24 | 28 | 3 | 25 | 29520.975 | 0.105E-03 |
| 16 | 2 | 15 | 15 | 1 | 14 | 29547.766 | 0.594E-03 |
| 10 | 3 | 8  | 9  | 2 | 7  | 29554.384 | 0.921E-03 |
| 22 | 2 | 20 | 22 | 1 | 21 | 29585.200 | 0.442E-03 |
| 24 | 4 | 21 | 24 | 3 | 22 | 29632.099 | 0.272E-03 |
| 26 | 5 | 22 | 26 | 4 | 23 | 29658.037 | 0.160E-03 |
| 19 | 3 | 16 | 18 | 4 | 15 | 29777.215 | 0.205E-03 |
| 17 | 2 | 15 | 16 | 3 | 14 | 29807.825 | 0.306E-03 |
| 6  | 4 | 3  | 5  | 3 | 2  | 29818.277 | 0.113E-02 |
| 6  | 4 | 2  | 5  | 3 | 3  | 29839.281 | 0.113E-02 |
| 27 | 6 | 22 | 27 | 5 | 23 | 29846.854 | 0.112E-03 |
| 25 | 5 | 20 | 24 | 6 | 19 | 29919.123 | 0.582E-04 |
| 22 | 3 | 20 | 22 | 2 | 21 | 29943.162 | 0.449E-03 |

### N1AC-3: a-type transitions (J''=0-30)

| J' Ka' Kc' <-- | J'' Ka'' Kc'' | Frequency<br>(MHz) | logarithm<br>of intensity |
|----------------|---------------|--------------------|---------------------------|
| 4 1 4          | 3 1 3         | 5494.472           | 0.206E-03                 |
| 4 0 4          | 3 0 3         | 5682.684           | 0.240E-03                 |
| 4 2 3          | 3 2 2         | 5699.532           | 0.167E-03                 |
| 4 3 2          | 3 3 1         | 5704.556           | 0.881E-04                 |
| 4 3 1          | 3 3 0         | 5704.680           | 0.881E-04                 |
| 4 2 2          | 3 2 1         | 5717.803           | 0.168E-03                 |
| 4 1 3          | 3 1 2         | 5900.115           | 0.237E-03                 |
| 18 2 16        | 18 2 17       | 6578.374           | 0.104E-04                 |
| 5 1 5          | 4 1 4         | 6864.795           | 0.400E-03                 |
| 5 0 5          | 4 0 4         | 7089.758           | 0.453E-03                 |
| 5 2 4          | 4 2 3         | 7122.126           | 0.354E-03                 |
| 5 4 2          | 4 4 1         | 7130.263           | 0.119E-03                 |
| 5 4 1          | 4 4 0         | 7130.265           | 0.119E-03                 |
| 5 3 3          | 4 3 2         | 7132.274           | 0.244E-03                 |
| 5 3 2          | 4 3 1         | 7132.707           | 0.244E-03                 |
| 5 2 3          | 4 2 2         | 7158.561           | 0.357E-03                 |
| 5 1 4          | 4 1 3         | 7371.570           | 0.459E-03                 |
| 19 2 17        | 19 2 18       | 7760.980           | 0.121E-04                 |
| 12 1 11        | 12 1 12       | 7810.846           | 0.110E-04                 |
| 6 1 6          | 5 1 5         | 8233.031           | 0.675E-03                 |
| 6 0 6          | 5 0 5         | 8488.006           | 0.750E-03                 |
| 6 2 5          | 5 2 4         | 8543.197           | 0.623E-03                 |
| 6 5 2          | 5 5 1         | 8556.011           | 0.140E-03                 |
| 6 5 1          | 5 5 0         | 8556.011           | 0.140E-03                 |
| 6 4 3          | 5 4 2         | 8557.656           | 0.306E-03                 |
| 6 4 2          | 5 4 1         | 8557.663           | 0.306E-03                 |
| 6 3 4          | 5 3 3         | 8560.933           | 0.477E-03                 |
| 6 3 3          | 5 3 2         | 8562.088           | 0.477E-03                 |
| 6 2 4          | 5 2 3         | 8606.617           | 0.632E-03                 |
| 6 1 5          | 5 1 4         | 8840.528           | 0.772E-03                 |
| 20 2 18        | 20 2 19       | 9040.690           | 0.136E-04                 |
| 13 1 12        | 13 1 13       | 9069.657           | 0.126E-04                 |
| 7 1 7          | 6 1 6         | 9598.873           | 0.103E-02                 |
| 7 0 7          | 6 0 6         | 9876.052           | 0.113E-02                 |
| 7 2 6          | 6 2 5         | 9962.441           | 0.976E-03                 |
| 7 6 2          | 6 6 1         | 9981.799           | 0.148E-03                 |

|    |    |    |    |    |    |           |           |
|----|----|----|----|----|----|-----------|-----------|
| 7  | 6  | 1  | 6  | 6  | 0  | 9981.799  | 0.148E-03 |
| 7  | 5  | 3  | 6  | 5  | 2  | 9983.170  | 0.342E-03 |
| 7  | 5  | 2  | 6  | 5  | 1  | 9983.171  | 0.342E-03 |
| 7  | 4  | 4  | 6  | 4  | 3  | 9985.777  | 0.564E-03 |
| 7  | 4  | 3  | 6  | 4  | 2  | 9985.800  | 0.564E-03 |
| 7  | 3  | 5  | 6  | 3  | 4  | 9990.614  | 0.788E-03 |
| 7  | 3  | 4  | 6  | 3  | 3  | 9993.209  | 0.789E-03 |
| 7  | 2  | 5  | 6  | 2  | 4  | 10063.038 | 0.995E-03 |
| 7  | 1  | 6  | 6  | 1  | 5  | 10306.370 | 0.118E-02 |
| 14 | 1  | 13 | 14 | 1  | 14 | 10403.741 | 0.141E-04 |
| 21 | 2  | 19 | 21 | 2  | 20 | 10412.113 | 0.148E-04 |
| 8  | 1  | 8  | 7  | 1  | 7  | 10962.064 | 0.147E-02 |
| 8  | 0  | 8  | 7  | 0  | 7  | 11252.897 | 0.160E-02 |
| 8  | 2  | 7  | 7  | 2  | 6  | 11379.559 | 0.141E-02 |
| 8  | 7  | 2  | 7  | 7  | 1  | 11407.608 | 0.143E-03 |
| 8  | 7  | 1  | 7  | 7  | 0  | 11407.608 | 0.143E-03 |
| 8  | 6  | 3  | 7  | 6  | 2  | 11408.817 | 0.347E-03 |
| 8  | 6  | 2  | 7  | 6  | 1  | 11408.817 | 0.347E-03 |
| 8  | 5  | 4  | 7  | 5  | 3  | 11410.864 | 0.603E-03 |
| 8  | 5  | 3  | 7  | 5  | 2  | 11410.864 | 0.603E-03 |
| 8  | 4  | 5  | 7  | 4  | 4  | 11414.742 | 0.891E-03 |
| 8  | 4  | 4  | 7  | 4  | 3  | 11414.806 | 0.891E-03 |
| 8  | 3  | 6  | 7  | 3  | 5  | 11421.342 | 0.118E-02 |
| 8  | 3  | 5  | 7  | 3  | 4  | 11426.522 | 0.118E-02 |
| 8  | 2  | 6  | 7  | 2  | 5  | 11528.510 | 0.145E-02 |
| 8  | 1  | 7  | 7  | 1  | 6  | 11768.419 | 0.167E-02 |
| 15 | 1  | 14 | 15 | 1  | 15 | 11805.285 | 0.153E-04 |
| 22 | 2  | 20 | 22 | 2  | 21 | 11868.861 | 0.158E-04 |
| 9  | 1  | 9  | 8  | 1  | 8  | 12322.412 | 0.199E-02 |
| 9  | 0  | 9  | 8  | 0  | 8  | 12618.060 | 0.214E-02 |
| 9  | 2  | 8  | 8  | 2  | 7  | 12794.257 | 0.192E-02 |
| 9  | 8  | 2  | 8  | 8  | 1  | 12833.428 | 0.127E-03 |
| 9  | 8  | 1  | 8  | 8  | 0  | 12833.428 | 0.127E-03 |
| 9  | 7  | 3  | 8  | 7  | 2  | 12834.532 | 0.323E-03 |
| 9  | 7  | 2  | 8  | 7  | 1  | 12834.532 | 0.323E-03 |
| 9  | 6  | 4  | 8  | 6  | 3  | 12836.254 | 0.591E-03 |
| 9  | 6  | 3  | 8  | 6  | 2  | 12836.254 | 0.591E-03 |
| 9  | 5  | 5  | 8  | 5  | 4  | 12839.168 | 0.920E-03 |
| 9  | 5  | 4  | 8  | 5  | 3  | 12839.169 | 0.920E-03 |
| 9  | 4  | 6  | 8  | 4  | 5  | 12844.663 | 0.128E-02 |
| 9  | 4  | 5  | 8  | 4  | 4  | 12844.816 | 0.128E-02 |
| 9  | 3  | 7  | 8  | 3  | 6  | 12853.084 | 0.164E-02 |
| 9  | 3  | 6  | 8  | 3  | 5  | 12862.553 | 0.164E-02 |
| 9  | 2  | 7  | 8  | 2  | 6  | 13003.195 | 0.198E-02 |
| 9  | 1  | 8  | 8  | 1  | 7  | 13225.918 | 0.224E-02 |
| 16 | 1  | 15 | 16 | 1  | 16 | 13265.300 | 0.163E-04 |
| 23 | 2  | 21 | 23 | 2  | 22 | 13403.542 | 0.165E-04 |
| 10 | 1  | 10 | 9  | 1  | 9  | 13679.783 | 0.256E-02 |
| 10 | 0  | 10 | 9  | 0  | 9  | 13971.682 | 0.273E-02 |
| 10 | 2  | 9  | 9  | 2  | 8  | 14206.245 | 0.249E-02 |
| 10 | 9  | 1  | 9  | 9  | 0  | 14259.256 | 0.105E-03 |
| 10 | 9  | 2  | 9  | 9  | 1  | 14259.256 | 0.105E-03 |
| 10 | 8  | 2  | 9  | 8  | 1  | 14260.285 | 0.280E-03 |
| 10 | 8  | 3  | 9  | 8  | 2  | 14260.285 | 0.280E-03 |
| 10 | 7  | 4  | 9  | 7  | 3  | 14261.799 | 0.536E-03 |
| 10 | 7  | 3  | 9  | 7  | 2  | 14261.799 | 0.536E-03 |
| 10 | 6  | 5  | 9  | 6  | 4  | 14264.161 | 0.876E-03 |
| 10 | 6  | 4  | 9  | 6  | 3  | 14264.161 | 0.876E-03 |
| 10 | 5  | 6  | 9  | 5  | 5  | 14268.159 | 0.128E-02 |
| 10 | 5  | 5  | 9  | 5  | 4  | 14268.163 | 0.128E-02 |
| 10 | 4  | 7  | 9  | 4  | 6  | 14275.644 | 0.173E-02 |
| 10 | 4  | 6  | 9  | 4  | 5  | 14275.975 | 0.173E-02 |
| 10 | 3  | 8  | 9  | 3  | 7  | 14285.740 | 0.216E-02 |
| 10 | 3  | 7  | 9  | 3  | 6  | 14301.905 | 0.216E-02 |
| 10 | 2  | 8  | 9  | 2  | 7  | 14486.622 | 0.258E-02 |
| 10 | 1  | 9  | 9  | 1  | 8  | 14678.034 | 0.288E-02 |
| 17 | 1  | 16 | 17 | 1  | 17 | 14773.779 | 0.170E-04 |
| 24 | 2  | 22 | 24 | 2  | 23 | 15007.746 | 0.168E-04 |
| 11 | 1  | 11 | 10 | 1  | 10 | 15034.113 | 0.318E-02 |
| 11 | 0  | 11 | 10 | 0  | 10 | 15314.557 | 0.336E-02 |
| 11 | 2  | 10 | 10 | 2  | 9  | 15615.246 | 0.310E-02 |
| 11 | 10 | 2  | 10 | 10 | 1  | 15685.088 | 0.806E-04 |
| 11 | 10 | 1  | 10 | 10 | 0  | 15685.088 | 0.806E-04 |
| 11 | 9  | 3  | 10 | 9  | 2  | 15686.063 | 0.225E-03 |
| 11 | 9  | 2  | 10 | 9  | 1  | 15686.063 | 0.225E-03 |
| 11 | 8  | 4  | 10 | 8  | 3  | 15687.433 | 0.453E-03 |
| 11 | 8  | 3  | 10 | 8  | 2  | 15687.433 | 0.453E-03 |

|    |    |    |    |    |    |           |           |
|----|----|----|----|----|----|-----------|-----------|
| 11 | 7  | 5  | 10 | 7  | 4  | 15689.448 | 0.775E-03 |
| 11 | 7  | 4  | 10 | 7  | 3  | 15689.448 | 0.775E-03 |
| 11 | 6  | 6  | 10 | 6  | 5  | 15692.593 | 0.119E-02 |
| 11 | 6  | 5  | 10 | 6  | 4  | 15692.593 | 0.119E-02 |
| 11 | 5  | 7  | 10 | 5  | 6  | 15697.914 | 0.168E-02 |
| 11 | 5  | 6  | 10 | 5  | 5  | 15697.923 | 0.168E-02 |
| 11 | 4  | 8  | 10 | 4  | 7  | 15707.782 | 0.221E-02 |
| 11 | 4  | 7  | 10 | 4  | 6  | 15708.442 | 0.221E-02 |
| 11 | 3  | 9  | 10 | 3  | 8  | 15719.148 | 0.272E-02 |
| 11 | 3  | 8  | 10 | 3  | 7  | 15745.268 | 0.273E-02 |
| 11 | 2  | 9  | 10 | 2  | 8  | 15977.657 | 0.323E-02 |
| 11 | 1  | 10 | 10 | 1  | 9  | 16123.846 | 0.356E-02 |
| 18 | 1  | 17 | 18 | 1  | 18 | 16319.982 | 0.174E-04 |
| 12 | 1  | 12 | 11 | 1  | 11 | 16385.397 | 0.383E-02 |
| 12 | 0  | 12 | 11 | 0  | 11 | 16648.057 | 0.402E-02 |
| 25 | 2  | 23 | 25 | 2  | 24 | 16672.067 | 0.168E-04 |
| 12 | 2  | 11 | 11 | 2  | 10 | 17020.991 | 0.374E-02 |
| 12 | 11 | 2  | 11 | 11 | 1  | 17110.924 | 0.582E-04 |
| 12 | 11 | 1  | 11 | 11 | 0  | 17110.924 | 0.582E-04 |
| 12 | 10 | 3  | 11 | 10 | 2  | 17111.856 | 0.170E-03 |
| 12 | 10 | 2  | 11 | 10 | 1  | 17111.856 | 0.170E-03 |
| 12 | 9  | 3  | 11 | 9  | 2  | 17113.121 | 0.358E-03 |
| 12 | 9  | 4  | 11 | 9  | 3  | 17113.121 | 0.358E-03 |
| 12 | 8  | 4  | 11 | 8  | 3  | 17114.900 | 0.641E-03 |
| 12 | 8  | 5  | 11 | 8  | 4  | 17114.900 | 0.641E-03 |
| 12 | 7  | 5  | 11 | 7  | 4  | 17117.517 | 0.103E-02 |
| 12 | 7  | 6  | 11 | 7  | 5  | 17117.517 | 0.103E-02 |
| 12 | 6  | 7  | 11 | 6  | 6  | 17121.601 | 0.153E-02 |
| 12 | 6  | 6  | 11 | 6  | 5  | 17121.601 | 0.153E-02 |
| 12 | 5  | 8  | 11 | 5  | 7  | 17128.510 | 0.210E-02 |
| 12 | 5  | 7  | 11 | 5  | 6  | 17128.528 | 0.210E-02 |
| 12 | 4  | 9  | 11 | 4  | 8  | 17141.160 | 0.272E-02 |
| 12 | 4  | 8  | 11 | 4  | 7  | 17142.394 | 0.272E-02 |
| 12 | 3  | 10 | 11 | 3  | 9  | 17153.084 | 0.331E-02 |
| 12 | 3  | 9  | 11 | 3  | 8  | 17193.408 | 0.332E-02 |
| 12 | 2  | 10 | 11 | 2  | 9  | 17474.567 | 0.392E-02 |
| 12 | 1  | 11 | 11 | 1  | 10 | 17562.356 | 0.425E-02 |
| 13 | 1  | 13 | 12 | 1  | 12 | 17733.689 | 0.448E-02 |
| 19 | 1  | 18 | 19 | 1  | 19 | 17892.832 | 0.175E-04 |
| 13 | 0  | 13 | 12 | 0  | 12 | 17973.954 | 0.467E-02 |
| 26 | 2  | 24 | 26 | 2  | 25 | 18386.182 | 0.165E-04 |
| 13 | 2  | 12 | 12 | 2  | 11 | 18423.233 | 0.438E-02 |
| 13 | 12 | 1  | 12 | 12 | 0  | 18536.762 | 0.395E-04 |
| 13 | 12 | 2  | 12 | 12 | 1  | 18536.762 | 0.395E-04 |
| 13 | 11 | 3  | 12 | 11 | 2  | 18537.661 | 0.121E-03 |
| 13 | 11 | 2  | 12 | 11 | 1  | 18537.661 | 0.121E-03 |
| 13 | 10 | 4  | 12 | 10 | 3  | 18538.846 | 0.266E-03 |
| 13 | 10 | 3  | 12 | 10 | 2  | 18538.846 | 0.266E-03 |
| 13 | 9  | 5  | 12 | 9  | 4  | 18540.455 | 0.498E-03 |
| 13 | 9  | 4  | 12 | 9  | 3  | 18540.455 | 0.498E-03 |
| 13 | 8  | 6  | 12 | 8  | 5  | 18542.717 | 0.837E-03 |
| 13 | 8  | 5  | 12 | 8  | 4  | 18542.717 | 0.837E-03 |
| 13 | 7  | 6  | 12 | 7  | 5  | 18546.044 | 0.130E-02 |
| 13 | 7  | 7  | 12 | 7  | 6  | 18546.044 | 0.130E-02 |
| 13 | 6  | 8  | 12 | 6  | 7  | 18551.238 | 0.187E-02 |
| 13 | 6  | 7  | 12 | 6  | 6  | 18551.238 | 0.187E-02 |
| 13 | 5  | 9  | 12 | 5  | 8  | 18560.021 | 0.253E-02 |
| 13 | 5  | 8  | 12 | 5  | 7  | 18560.061 | 0.253E-02 |
| 13 | 4  | 10 | 12 | 4  | 9  | 18575.842 | 0.323E-02 |
| 13 | 4  | 9  | 12 | 4  | 8  | 18578.031 | 0.323E-02 |
| 13 | 3  | 11 | 12 | 3  | 10 | 18587.263 | 0.390E-02 |
| 13 | 3  | 10 | 12 | 3  | 9  | 18647.156 | 0.392E-02 |
| 13 | 2  | 11 | 12 | 2  | 10 | 18975.196 | 0.460E-02 |
| 13 | 1  | 12 | 12 | 1  | 11 | 18992.500 | 0.494E-02 |
| 14 | 1  | 14 | 13 | 1  | 13 | 19079.097 | 0.512E-02 |
| 14 | 0  | 14 | 13 | 0  | 13 | 19294.182 | 0.530E-02 |
| 20 | 1  | 19 | 20 | 1  | 20 | 19481.413 | 0.172E-04 |
| 14 | 2  | 13 | 13 | 2  | 12 | 19821.741 | 0.500E-02 |
| 14 | 13 | 2  | 13 | 13 | 1  | 19962.602 | 0.253E-04 |
| 14 | 13 | 1  | 13 | 13 | 0  | 19962.602 | 0.253E-04 |
| 14 | 12 | 3  | 13 | 12 | 2  | 19963.474 | 0.807E-04 |
| 14 | 12 | 2  | 13 | 12 | 1  | 19963.474 | 0.807E-04 |
| 14 | 11 | 4  | 13 | 11 | 3  | 19964.596 | 0.185E-03 |
| 14 | 11 | 3  | 13 | 11 | 2  | 19964.596 | 0.185E-03 |
| 14 | 10 | 5  | 13 | 10 | 4  | 19966.076 | 0.363E-03 |
| 14 | 10 | 4  | 13 | 10 | 3  | 19966.076 | 0.363E-03 |
| 14 | 9  | 6  | 13 | 9  | 5  | 19968.086 | 0.638E-03 |

|    |    |    |    |    |    |           |           |
|----|----|----|----|----|----|-----------|-----------|
| 14 | 9  | 5  | 13 | 9  | 4  | 19968.086 | 0.638E-03 |
| 14 | 8  | 7  | 13 | 8  | 6  | 19970.911 | 0.103E-02 |
| 14 | 8  | 6  | 13 | 8  | 5  | 19970.911 | 0.103E-02 |
| 14 | 7  | 8  | 13 | 7  | 7  | 19975.068 | 0.156E-02 |
| 14 | 7  | 7  | 13 | 7  | 6  | 19975.068 | 0.156E-02 |
| 14 | 6  | 9  | 13 | 6  | 8  | 19981.557 | 0.221E-02 |
| 14 | 6  | 8  | 13 | 6  | 7  | 19981.558 | 0.221E-02 |
| 14 | 5  | 10 | 13 | 5  | 9  | 19992.524 | 0.295E-02 |
| 14 | 5  | 9  | 13 | 5  | 8  | 19992.603 | 0.295E-02 |
| 14 | 4  | 11 | 13 | 4  | 10 | 20011.875 | 0.374E-02 |
| 14 | 4  | 10 | 13 | 4  | 9  | 20015.582 | 0.374E-02 |
| 14 | 3  | 12 | 13 | 3  | 11 | 20021.351 | 0.447E-02 |
| 14 | 3  | 11 | 13 | 3  | 10 | 20107.374 | 0.451E-02 |
| 27 | 2  | 25 | 27 | 2  | 26 | 20139.017 | 0.158E-04 |
| 14 | 1  | 13 | 13 | 1  | 12 | 20413.180 | 0.560E-02 |
| 15 | 1  | 15 | 14 | 1  | 14 | 20421.769 | 0.572E-02 |
| 14 | 2  | 12 | 13 | 2  | 11 | 20477.196 | 0.527E-02 |
| 15 | 0  | 15 | 14 | 0  | 14 | 20610.610 | 0.588E-02 |
| 21 | 1  | 20 | 21 | 1  | 21 | 21075.508 | 0.167E-04 |
| 15 | 2  | 14 | 14 | 2  | 13 | 21216.312 | 0.558E-02 |
| 15 | 14 | 2  | 14 | 14 | 1  | 21388.444 | 0.152E-04 |
| 15 | 14 | 1  | 14 | 14 | 0  | 21388.444 | 0.152E-04 |
| 15 | 13 | 3  | 14 | 13 | 2  | 21389.293 | 0.509E-04 |
| 15 | 13 | 2  | 14 | 13 | 1  | 21389.293 | 0.509E-04 |
| 15 | 12 | 4  | 14 | 12 | 3  | 21390.364 | 0.122E-03 |
| 15 | 12 | 3  | 14 | 12 | 2  | 21390.364 | 0.122E-03 |
| 15 | 11 | 5  | 14 | 11 | 4  | 21391.745 | 0.249E-03 |
| 15 | 11 | 4  | 14 | 11 | 3  | 21391.745 | 0.249E-03 |
| 15 | 10 | 6  | 14 | 10 | 5  | 21393.566 | 0.458E-03 |
| 15 | 10 | 5  | 14 | 10 | 4  | 21393.566 | 0.458E-03 |
| 15 | 9  | 7  | 14 | 9  | 6  | 21396.037 | 0.776E-03 |
| 15 | 9  | 6  | 14 | 9  | 5  | 21396.037 | 0.776E-03 |
| 15 | 8  | 8  | 14 | 8  | 7  | 21399.513 | 0.122E-02 |
| 15 | 8  | 7  | 14 | 8  | 6  | 21399.513 | 0.122E-02 |
| 15 | 7  | 9  | 14 | 7  | 8  | 21404.627 | 0.181E-02 |
| 15 | 7  | 8  | 14 | 7  | 7  | 21404.627 | 0.181E-02 |
| 15 | 6  | 10 | 14 | 6  | 9  | 21412.613 | 0.253E-02 |
| 15 | 6  | 9  | 14 | 6  | 8  | 21412.615 | 0.253E-02 |
| 15 | 5  | 11 | 14 | 5  | 10 | 21426.092 | 0.335E-02 |
| 15 | 5  | 10 | 14 | 5  | 9  | 21426.242 | 0.335E-02 |
| 15 | 4  | 12 | 14 | 4  | 11 | 21449.277 | 0.421E-02 |
| 15 | 3  | 13 | 14 | 3  | 12 | 21454.970 | 0.501E-02 |
| 15 | 4  | 11 | 14 | 4  | 10 | 21455.316 | 0.421E-02 |
| 15 | 3  | 12 | 14 | 3  | 11 | 21574.904 | 0.506E-02 |
| 16 | 1  | 16 | 15 | 1  | 15 | 21761.891 | 0.627E-02 |
| 15 | 1  | 14 | 14 | 1  | 13 | 21823.313 | 0.620E-02 |
| 28 | 2  | 26 | 28 | 2  | 27 | 21919.011 | 0.149E-04 |
| 16 | 0  | 16 | 15 | 0  | 15 | 21924.856 | 0.641E-02 |
| 15 | 2  | 13 | 14 | 2  | 12 | 21978.245 | 0.589E-02 |
| 16 | 2  | 15 | 15 | 2  | 14 | 22606.773 | 0.609E-02 |
| 22 | 1  | 21 | 22 | 1  | 22 | 22666.100 | 0.159E-04 |
| 16 | 14 | 3  | 15 | 14 | 2  | 22815.116 | 0.303E-04 |
| 16 | 14 | 2  | 15 | 14 | 1  | 22815.116 | 0.303E-04 |
| 16 | 13 | 4  | 15 | 13 | 3  | 22816.146 | 0.758E-04 |
| 16 | 13 | 3  | 15 | 13 | 2  | 22816.146 | 0.758E-04 |
| 16 | 12 | 5  | 15 | 12 | 4  | 22817.447 | 0.162E-03 |
| 16 | 12 | 4  | 15 | 12 | 3  | 22817.447 | 0.162E-03 |
| 16 | 11 | 6  | 15 | 11 | 5  | 22819.123 | 0.311E-03 |
| 16 | 11 | 5  | 15 | 11 | 4  | 22819.123 | 0.311E-03 |
| 16 | 10 | 7  | 15 | 10 | 6  | 22821.333 | 0.549E-03 |
| 16 | 10 | 6  | 15 | 10 | 5  | 22821.333 | 0.549E-03 |
| 16 | 9  | 8  | 15 | 9  | 7  | 22824.333 | 0.905E-03 |
| 16 | 9  | 7  | 15 | 9  | 6  | 22824.333 | 0.905E-03 |
| 16 | 8  | 9  | 15 | 8  | 8  | 22828.552 | 0.140E-02 |
| 16 | 8  | 8  | 15 | 8  | 7  | 22828.552 | 0.140E-02 |
| 16 | 7  | 10 | 15 | 7  | 9  | 22834.761 | 0.205E-02 |
| 16 | 7  | 9  | 15 | 7  | 8  | 22834.761 | 0.205E-02 |
| 16 | 6  | 11 | 15 | 6  | 10 | 22844.458 | 0.283E-02 |
| 16 | 6  | 10 | 15 | 6  | 9  | 22844.462 | 0.283E-02 |
| 16 | 5  | 12 | 15 | 5  | 11 | 22860.799 | 0.372E-02 |
| 16 | 5  | 11 | 15 | 5  | 10 | 22861.071 | 0.372E-02 |
| 16 | 3  | 14 | 15 | 3  | 13 | 22887.711 | 0.550E-02 |
| 16 | 4  | 13 | 15 | 4  | 12 | 22888.037 | 0.464E-02 |
| 16 | 4  | 12 | 15 | 4  | 11 | 22897.546 | 0.464E-02 |
| 16 | 3  | 13 | 15 | 3  | 12 | 23050.493 | 0.557E-02 |
| 17 | 1  | 17 | 16 | 1  | 16 | 23099.673 | 0.674E-02 |
| 16 | 1  | 15 | 15 | 1  | 14 | 23221.906 | 0.672E-02 |

|    |    |    |    |    |    |           |           |
|----|----|----|----|----|----|-----------|-----------|
| 17 | 0  | 17 | 16 | 0  | 16 | 23238.196 | 0.687E-02 |
| 16 | 2  | 14 | 15 | 2  | 13 | 23476.227 | 0.644E-02 |
| 29 | 2  | 27 | 29 | 2  | 28 | 23714.483 | 0.139E-04 |
| 17 | 2  | 16 | 16 | 2  | 15 | 23992.984 | 0.653E-02 |
| 17 | 15 | 3  | 16 | 15 | 2  | 24240.943 | 0.170E-04 |
| 17 | 15 | 2  | 16 | 15 | 1  | 24240.943 | 0.170E-04 |
| 17 | 14 | 4  | 16 | 14 | 3  | 24241.939 | 0.445E-04 |
| 17 | 14 | 3  | 16 | 14 | 2  | 24241.939 | 0.445E-04 |
| 17 | 13 | 5  | 16 | 13 | 4  | 24243.175 | 0.992E-04 |
| 17 | 13 | 4  | 16 | 13 | 3  | 24243.175 | 0.992E-04 |
| 17 | 12 | 6  | 16 | 12 | 5  | 24244.735 | 0.199E-03 |
| 17 | 12 | 5  | 16 | 12 | 4  | 24244.735 | 0.199E-03 |
| 23 | 1  | 22 | 23 | 1  | 23 | 24245.771 | 0.150E-04 |
| 17 | 11 | 7  | 16 | 11 | 6  | 24246.745 | 0.367E-03 |
| 17 | 11 | 6  | 16 | 11 | 5  | 24246.745 | 0.367E-03 |
| 17 | 10 | 8  | 16 | 10 | 7  | 24249.396 | 0.631E-03 |
| 17 | 10 | 7  | 16 | 10 | 6  | 24249.396 | 0.631E-03 |
| 17 | 9  | 9  | 16 | 9  | 8  | 24252.995 | 0.102E-02 |
| 17 | 9  | 8  | 16 | 9  | 7  | 24252.995 | 0.102E-02 |
| 17 | 8  | 10 | 16 | 8  | 9  | 24258.057 | 0.156E-02 |
| 17 | 8  | 9  | 16 | 8  | 8  | 24258.057 | 0.156E-02 |
| 17 | 7  | 11 | 16 | 7  | 10 | 24265.507 | 0.225E-02 |
| 17 | 7  | 10 | 16 | 7  | 9  | 24265.507 | 0.225E-02 |
| 17 | 6  | 12 | 16 | 6  | 11 | 24277.146 | 0.309E-02 |
| 17 | 6  | 11 | 16 | 6  | 10 | 24277.155 | 0.309E-02 |
| 17 | 5  | 13 | 16 | 5  | 12 | 24296.712 | 0.403E-02 |
| 17 | 5  | 12 | 16 | 5  | 11 | 24297.187 | 0.403E-02 |
| 17 | 3  | 15 | 16 | 3  | 14 | 24319.141 | 0.592E-02 |
| 17 | 4  | 14 | 16 | 4  | 13 | 24328.109 | 0.501E-02 |
| 17 | 4  | 13 | 16 | 4  | 12 | 24342.640 | 0.502E-02 |
| 18 | 1  | 18 | 17 | 1  | 17 | 24435.337 | 0.713E-02 |
| 17 | 3  | 14 | 16 | 3  | 13 | 24534.697 | 0.600E-02 |
| 18 | 0  | 18 | 17 | 0  | 17 | 24551.548 | 0.724E-02 |
| 17 | 1  | 16 | 16 | 1  | 15 | 24608.153 | 0.715E-02 |
| 17 | 2  | 15 | 16 | 2  | 14 | 24969.310 | 0.691E-02 |

### W2A: b-type transitions (J''=0-10)

| J' | Ka' | Kc' | <-- | J'' | Ka'' | Kc'' | Frequency<br>(MHz) | logarithm<br>of intensity |
|----|-----|-----|-----|-----|------|------|--------------------|---------------------------|
| 8  | 2   | 7   |     | 9   | 1    | 8    | 5053.021           | 0.152E-04                 |
| 17 | 1   | 16  |     | 16  | 2    | 15   | 5067.684           | 0.190E-04                 |
| 17 | 3   | 15  |     | 18  | 2    | 16   | 5093.867           | 0.148E-04                 |
| 17 | 3   | 14  |     | 18  | 2    | 17   | 5146.608           | 0.151E-04                 |
| 1  | 1   | 0   |     | 1   | 0    | 1    | 5373.270           | 0.220E-04                 |
| 2  | 1   | 1   |     | 2   | 0    | 2    | 5382.091           | 0.364E-04                 |
| 3  | 1   | 2   |     | 3   | 0    | 3    | 5395.342           | 0.503E-04                 |
| 4  | 1   | 3   |     | 4   | 0    | 4    | 5413.049           | 0.636E-04                 |
| 5  | 1   | 4   |     | 5   | 0    | 5    | 5435.243           | 0.761E-04                 |
| 8  | 2   | 6   |     | 9   | 1    | 9    | 5451.740           | 0.178E-04                 |
| 6  | 1   | 5   |     | 6   | 0    | 6    | 5461.966           | 0.877E-04                 |
| 7  | 1   | 6   |     | 7   | 0    | 7    | 5493.265           | 0.983E-04                 |
| 8  | 1   | 7   |     | 8   | 0    | 8    | 5529.198           | 0.108E-03                 |
| 9  | 1   | 8   |     | 9   | 0    | 9    | 5569.829           | 0.116E-03                 |
| 10 | 1   | 9   |     | 10  | 0    | 10   | 5615.230           | 0.123E-03                 |
| 9  | 0   | 9   |     | 8   | 1    | 8    | 5642.547           | 0.515E-04                 |
| 11 | 1   | 10  |     | 11  | 0    | 11   | 5665.482           | 0.129E-03                 |
| 12 | 1   | 11  |     | 12  | 0    | 12   | 5720.674           | 0.133E-03                 |
| 13 | 1   | 12  |     | 13  | 0    | 13   | 5780.900           | 0.136E-03                 |
| 14 | 1   | 13  |     | 14  | 0    | 14   | 5846.263           | 0.138E-03                 |
| 27 | 2   | 25  |     | 26  | 3    | 24   | 5909.678           | 0.103E-04                 |
| 19 | 1   | 19  |     | 18  | 2    | 16   | 5914.717           | 0.241E-04                 |
| 15 | 1   | 14  |     | 15  | 0    | 15   | 5916.875           | 0.138E-03                 |
| 16 | 1   | 15  |     | 16  | 0    | 16   | 5992.853           | 0.138E-03                 |
| 17 | 1   | 16  |     | 17  | 0    | 17   | 6074.321           | 0.136E-03                 |
| 18 | 1   | 17  |     | 18  | 0    | 18   | 6161.409           | 0.133E-03                 |
| 19 | 1   | 18  |     | 19  | 0    | 19   | 6254.256           | 0.129E-03                 |
| 7  | 2   | 6   |     | 8   | 1    | 7    | 6298.693           | 0.210E-04                 |
| 16 | 3   | 14  |     | 17  | 2    | 15   | 6307.742           | 0.233E-04                 |
| 16 | 3   | 13  |     | 17  | 2    | 16   | 6349.921           | 0.236E-04                 |
| 18 | 1   | 17  |     | 17  | 2    | 16   | 6351.950           | 0.289E-04                 |
| 20 | 1   | 19  |     | 20  | 0    | 20   | 6353.003           | 0.125E-03                 |
| 21 | 1   | 20  |     | 21  | 0    | 21   | 6457.800           | 0.120E-03                 |
| 22 | 1   | 21  |     | 22  | 0    | 22   | 6568.799           | 0.114E-03                 |
| 1  | 1   | 1   |     | 0   | 0    | 0    | 6570.670           | 0.220E-04                 |



|    |   |    |    |   |    |           |           |
|----|---|----|----|---|----|-----------|-----------|
| 7  | 2 | 5  | 8  | 1 | 8  | 6617.215  | 0.232E-04 |
| 23 | 1 | 22 | 23 | 0 | 23 | 6686.158  | 0.108E-03 |
| 24 | 1 | 23 | 24 | 0 | 24 | 6810.037  | 0.102E-03 |
| 28 | 2 | 27 | 27 | 3 | 24 | 6845.580  | 0.123E-04 |
| 10 | 0 | 10 | 9  | 1 | 9  | 6886.925  | 0.817E-04 |
| 25 | 1 | 24 | 25 | 0 | 25 | 6940.601  | 0.953E-04 |
| 20 | 1 | 20 | 19 | 2 | 17 | 7019.071  | 0.322E-04 |
| 26 | 1 | 25 | 26 | 0 | 26 | 7078.017  | 0.886E-04 |
| 28 | 2 | 26 | 27 | 3 | 25 | 7144.088  | 0.134E-04 |
| 27 | 1 | 26 | 27 | 0 | 27 | 7222.452  | 0.819E-04 |
| 28 | 1 | 27 | 28 | 0 | 28 | 7374.075  | 0.752E-04 |
| 24 | 4 | 21 | 25 | 3 | 22 | 7412.141  | 0.156E-04 |
| 24 | 4 | 20 | 25 | 3 | 23 | 7415.295  | 0.156E-04 |
| 15 | 3 | 13 | 16 | 2 | 14 | 7520.420  | 0.336E-04 |
| 29 | 1 | 28 | 29 | 0 | 29 | 7533.054  | 0.687E-04 |
| 6  | 2 | 5  | 7  | 1 | 6  | 7540.010  | 0.256E-04 |
| 15 | 3 | 12 | 16 | 2 | 15 | 7553.707  | 0.339E-04 |
| 19 | 1 | 18 | 18 | 2 | 17 | 7640.413  | 0.400E-04 |
| 30 | 1 | 29 | 30 | 0 | 30 | 7699.555  | 0.623E-04 |
| 2  | 1 | 2  | 1  | 0 | 1  | 7768.070  | 0.457E-04 |
| 6  | 2 | 4  | 7  | 1 | 7  | 7787.447  | 0.274E-04 |
| 29 | 2 | 28 | 28 | 3 | 25 | 8038.919  | 0.150E-04 |
| 21 | 1 | 21 | 20 | 2 | 18 | 8116.789  | 0.404E-04 |
| 11 | 0 | 11 | 10 | 1 | 10 | 8135.231  | 0.119E-03 |
| 29 | 2 | 27 | 28 | 3 | 26 | 8381.512  | 0.163E-04 |
| 23 | 4 | 20 | 24 | 3 | 21 | 8620.559  | 0.230E-04 |
| 23 | 4 | 19 | 24 | 3 | 22 | 8623.037  | 0.230E-04 |
| 14 | 3 | 12 | 15 | 2 | 13 | 8732.031  | 0.452E-04 |
| 14 | 3 | 11 | 15 | 2 | 14 | 8757.912  | 0.455E-04 |
| 5  | 2 | 4  | 6  | 1 | 5  | 8776.960  | 0.281E-04 |
| 20 | 1 | 19 | 19 | 2 | 18 | 8933.048  | 0.519E-04 |
| 3  | 1 | 3  | 2  | 0 | 2  | 8961.069  | 0.799E-04 |
| 5  | 2 | 3  | 6  | 1 | 6  | 8962.349  | 0.293E-04 |
| 22 | 1 | 22 | 21 | 2 | 19 | 9207.648  | 0.485E-04 |
| 30 | 2 | 29 | 29 | 3 | 26 | 9230.807  | 0.174E-04 |
| 12 | 0 | 12 | 11 | 1 | 11 | 9387.374  | 0.163E-03 |
| 30 | 2 | 28 | 29 | 3 | 27 | 9622.137  | 0.188E-04 |
| 22 | 4 | 19 | 23 | 3 | 20 | 9828.707  | 0.324E-04 |
| 22 | 4 | 18 | 23 | 3 | 21 | 9830.633  | 0.324E-04 |
| 13 | 3 | 11 | 14 | 2 | 12 | 9942.699  | 0.578E-04 |
| 13 | 3 | 10 | 14 | 2 | 13 | 9962.483  | 0.581E-04 |
| 4  | 2 | 3  | 5  | 1 | 4  | 10009.538 | 0.271E-04 |
| 4  | 2 | 2  | 5  | 1 | 5  | 10141.850 | 0.279E-04 |
| 4  | 1 | 4  | 3  | 0 | 3  | 10149.681 | 0.126E-03 |
| 21 | 1 | 20 | 20 | 2 | 19 | 10229.831 | 0.639E-04 |
| 23 | 1 | 23 | 22 | 2 | 20 | 10291.416 | 0.560E-04 |
| 13 | 0 | 13 | 12 | 1 | 12 | 10643.252 | 0.213E-03 |
| 21 | 4 | 18 | 22 | 3 | 19 | 11036.609 | 0.437E-04 |
| 21 | 4 | 17 | 22 | 3 | 20 | 11038.091 | 0.437E-04 |
| 12 | 3 | 10 | 13 | 2 | 11 | 11152.539 | 0.706E-04 |
| 12 | 3 | 9  | 13 | 2 | 12 | 11167.372 | 0.708E-04 |
| 3  | 2 | 2  | 4  | 1 | 3  | 11237.734 | 0.219E-04 |
| 3  | 2 | 1  | 4  | 1 | 4  | 11325.888 | 0.223E-04 |
| 5  | 1 | 5  | 4  | 0 | 4  | 11333.927 | 0.183E-03 |
| 24 | 1 | 24 | 23 | 2 | 21 | 11367.857 | 0.626E-04 |
| 22 | 1 | 21 | 21 | 2 | 20 | 11530.732 | 0.757E-04 |
| 14 | 0 | 14 | 13 | 1 | 13 | 11902.757 | 0.267E-03 |
| 29 | 5 | 25 | 30 | 4 | 26 | 12121.563 | 0.179E-04 |
| 29 | 5 | 24 | 30 | 4 | 27 | 12121.659 | 0.179E-04 |
| 20 | 4 | 17 | 21 | 3 | 18 | 12244.290 | 0.571E-04 |
| 20 | 4 | 16 | 21 | 3 | 19 | 12245.416 | 0.572E-04 |
| 11 | 3 | 9  | 12 | 2 | 10 | 12361.661 | 0.827E-04 |
| 11 | 3 | 8  | 12 | 2 | 11 | 12372.535 | 0.828E-04 |
| 25 | 1 | 25 | 24 | 2 | 22 | 12436.722 | 0.681E-04 |
| 2  | 2 | 1  | 3  | 1 | 2  | 12461.542 | 0.122E-04 |
| 6  | 1 | 6  | 5  | 0 | 5  | 12513.837 | 0.252E-03 |
| 2  | 2 | 0  | 3  | 1 | 3  | 12514.413 | 0.123E-04 |
| 23 | 1 | 22 | 22 | 2 | 21 | 12835.725 | 0.866E-04 |
| 15 | 0 | 15 | 14 | 1 | 14 | 13165.773 | 0.324E-03 |
| 28 | 5 | 24 | 29 | 4 | 25 | 13329.204 | 0.246E-04 |
| 28 | 5 | 23 | 29 | 4 | 26 | 13329.278 | 0.246E-04 |
| 19 | 4 | 16 | 20 | 3 | 17 | 13451.772 | 0.725E-04 |
| 19 | 4 | 15 | 20 | 3 | 18 | 13452.616 | 0.725E-04 |
| 26 | 1 | 26 | 25 | 2 | 23 | 13497.759 | 0.723E-04 |
| 10 | 3 | 8  | 11 | 2 | 9  | 13570.167 | 0.929E-04 |
| 10 | 3 | 7  | 11 | 2 | 10 | 13577.931 | 0.930E-04 |
| 7  | 1 | 7  | 6  | 0 | 6  | 13689.450 | 0.332E-03 |

|    |   |    |    |   |    |           |           |
|----|---|----|----|---|----|-----------|-----------|
| 24 | 1 | 23 | 23 | 2 | 22 | 14144.776 | 0.963E-04 |
| 16 | 0 | 16 | 15 | 1 | 15 | 14432.175 | 0.381E-03 |
| 30 | 2 | 28 | 30 | 1 | 29 | 14479.756 | 0.104E-03 |
| 27 | 5 | 23 | 28 | 4 | 24 | 14536.711 | 0.329E-04 |
| 27 | 5 | 22 | 28 | 4 | 25 | 14536.767 | 0.329E-04 |
| 27 | 1 | 27 | 26 | 2 | 24 | 14550.710 | 0.752E-04 |
| 29 | 2 | 27 | 29 | 1 | 28 | 14559.626 | 0.121E-03 |
| 28 | 2 | 26 | 28 | 1 | 27 | 14640.045 | 0.140E-03 |
| 18 | 4 | 15 | 19 | 3 | 16 | 14659.076 | 0.895E-04 |
| 18 | 4 | 14 | 19 | 3 | 17 | 14659.700 | 0.895E-04 |
| 27 | 2 | 25 | 27 | 1 | 26 | 14720.707 | 0.161E-03 |
| 9  | 3 | 7  | 10 | 2 | 8  | 14778.149 | 0.100E-03 |
| 9  | 3 | 6  | 10 | 2 | 9  | 14783.523 | 0.100E-03 |
| 26 | 2 | 24 | 26 | 1 | 25 | 14801.313 | 0.183E-03 |
| 8  | 1 | 8  | 7  | 0 | 7  | 14860.811 | 0.422E-03 |
| 25 | 2 | 23 | 25 | 1 | 24 | 14881.568 | 0.207E-03 |
| 24 | 2 | 22 | 24 | 1 | 23 | 14961.187 | 0.233E-03 |
| 23 | 2 | 21 | 23 | 1 | 22 | 15039.890 | 0.259E-03 |
| 22 | 2 | 20 | 22 | 1 | 21 | 15117.408 | 0.286E-03 |
| 21 | 2 | 19 | 21 | 1 | 20 | 15193.478 | 0.314E-03 |
| 20 | 2 | 18 | 20 | 1 | 19 | 15267.850 | 0.341E-03 |
| 19 | 2 | 17 | 19 | 1 | 18 | 15340.281 | 0.368E-03 |
| 18 | 2 | 16 | 18 | 1 | 17 | 15410.540 | 0.393E-03 |
| 25 | 1 | 24 | 24 | 2 | 23 | 15457.853 | 0.104E-03 |
| 17 | 2 | 15 | 17 | 1 | 16 | 15478.405 | 0.416E-03 |
| 16 | 2 | 14 | 16 | 1 | 15 | 15543.665 | 0.436E-03 |
| 28 | 1 | 28 | 27 | 2 | 25 | 15595.311 | 0.768E-04 |
| 15 | 2 | 13 | 15 | 1 | 14 | 15606.123 | 0.453E-03 |
| 14 | 2 | 12 | 14 | 1 | 13 | 15665.590 | 0.465E-03 |
| 17 | 0 | 17 | 16 | 1 | 16 | 15701.831 | 0.437E-03 |
| 13 | 2 | 11 | 13 | 1 | 12 | 15721.890 | 0.472E-03 |
| 26 | 5 | 22 | 27 | 4 | 23 | 15744.093 | 0.430E-04 |
| 26 | 5 | 21 | 27 | 4 | 24 | 15744.135 | 0.430E-04 |
| 12 | 2 | 10 | 12 | 1 | 11 | 15774.857 | 0.474E-03 |
| 11 | 2 | 9  | 11 | 1 | 10 | 15824.339 | 0.469E-03 |
| 17 | 4 | 14 | 18 | 3 | 15 | 15866.220 | 0.108E-03 |
| 17 | 4 | 13 | 18 | 3 | 16 | 15866.674 | 0.108E-03 |
| 10 | 2 | 8  | 10 | 1 | 9  | 15870.194 | 0.458E-03 |
| 9  | 2 | 7  | 9  | 1 | 8  | 15912.293 | 0.440E-03 |
| 8  | 2 | 6  | 8  | 1 | 7  | 15950.517 | 0.414E-03 |
| 7  | 2 | 5  | 7  | 1 | 6  | 15984.761 | 0.381E-03 |
| 8  | 3 | 6  | 9  | 2 | 7  | 15985.695 | 0.103E-03 |
| 8  | 3 | 5  | 9  | 2 | 8  | 15989.276 | 0.103E-03 |
| 6  | 2 | 4  | 6  | 1 | 5  | 16014.931 | 0.341E-03 |
| 9  | 1 | 9  | 8  | 0 | 8  | 16027.976 | 0.519E-03 |
| 5  | 2 | 3  | 5  | 1 | 4  | 16040.943 | 0.294E-03 |
| 4  | 2 | 2  | 4  | 1 | 3  | 16062.728 | 0.239E-03 |
| 3  | 2 | 1  | 3  | 1 | 2  | 16080.226 | 0.177E-03 |
| 2  | 2 | 0  | 2  | 1 | 1  | 16093.391 | 0.103E-03 |
| 2  | 2 | 1  | 2  | 1 | 2  | 16119.810 | 0.103E-03 |
| 3  | 2 | 2  | 3  | 1 | 3  | 16133.032 | 0.178E-03 |
| 4  | 2 | 3  | 4  | 1 | 4  | 16150.665 | 0.242E-03 |
| 5  | 2 | 4  | 5  | 1 | 5  | 16172.713 | 0.299E-03 |
| 6  | 2 | 5  | 6  | 1 | 6  | 16199.181 | 0.349E-03 |
| 7  | 2 | 6  | 7  | 1 | 7  | 16230.073 | 0.393E-03 |
| 8  | 2 | 7  | 8  | 1 | 8  | 16265.397 | 0.431E-03 |
| 9  | 2 | 8  | 9  | 1 | 9  | 16305.158 | 0.462E-03 |
| 10 | 2 | 9  | 10 | 1 | 10 | 16349.364 | 0.487E-03 |
| 11 | 2 | 10 | 11 | 1 | 11 | 16398.024 | 0.505E-03 |
| 12 | 2 | 11 | 12 | 1 | 12 | 16451.147 | 0.516E-03 |
| 13 | 2 | 12 | 13 | 1 | 13 | 16508.742 | 0.522E-03 |
| 14 | 2 | 13 | 14 | 1 | 14 | 16570.820 | 0.522E-03 |
| 29 | 1 | 29 | 28 | 2 | 26 | 16631.295 | 0.770E-04 |
| 15 | 2 | 14 | 15 | 1 | 15 | 16637.391 | 0.516E-03 |
| 16 | 2 | 15 | 16 | 1 | 16 | 16708.467 | 0.506E-03 |
| 26 | 1 | 25 | 25 | 2 | 24 | 16774.920 | 0.111E-03 |
| 17 | 2 | 16 | 17 | 1 | 17 | 16784.059 | 0.491E-03 |
| 18 | 2 | 17 | 18 | 1 | 18 | 16864.180 | 0.472E-03 |
| 19 | 2 | 18 | 19 | 1 | 19 | 16948.841 | 0.451E-03 |
| 25 | 5 | 21 | 26 | 4 | 22 | 16951.359 | 0.551E-04 |
| 25 | 5 | 20 | 26 | 4 | 23 | 16951.390 | 0.551E-04 |
| 18 | 0 | 18 | 17 | 1 | 17 | 16974.600 | 0.491E-03 |
| 20 | 2 | 19 | 20 | 1 | 20 | 17038.056 | 0.427E-03 |
| 16 | 4 | 13 | 17 | 3 | 14 | 17073.223 | 0.127E-03 |
| 16 | 4 | 12 | 17 | 3 | 15 | 17073.546 | 0.127E-03 |
| 21 | 2 | 20 | 21 | 1 | 21 | 17131.836 | 0.401E-03 |
| 10 | 1 | 10 | 9  | 0 | 9  | 17191.006 | 0.622E-03 |

|    |   |    |    |   |    |           |           |
|----|---|----|----|---|----|-----------|-----------|
| 7  | 3 | 5  | 8  | 2 | 6  | 17192.881 | 0.101E-03 |
| 7  | 3 | 4  | 8  | 2 | 7  | 17195.160 | 0.101E-03 |
| 22 | 2 | 21 | 22 | 1 | 22 | 17230.196 | 0.374E-03 |
| 23 | 2 | 22 | 23 | 1 | 23 | 17333.146 | 0.346E-03 |
| 24 | 2 | 23 | 24 | 1 | 24 | 17440.702 | 0.318E-03 |
| 25 | 2 | 24 | 25 | 1 | 25 | 17552.874 | 0.291E-03 |
| 30 | 1 | 30 | 29 | 2 | 27 | 17658.389 | 0.760E-04 |
| 26 | 2 | 25 | 26 | 1 | 26 | 17669.675 | 0.263E-03 |
| 27 | 2 | 26 | 27 | 1 | 27 | 17791.117 | 0.237E-03 |
| 28 | 2 | 27 | 28 | 1 | 28 | 17917.212 | 0.212E-03 |
| 29 | 2 | 28 | 29 | 1 | 29 | 18047.970 | 0.188E-03 |
| 27 | 1 | 26 | 26 | 2 | 25 | 18095.940 | 0.116E-03 |
| 24 | 5 | 20 | 25 | 4 | 21 | 18158.516 | 0.692E-04 |
| 24 | 5 | 19 | 25 | 4 | 22 | 18158.539 | 0.692E-04 |
| 30 | 2 | 29 | 30 | 1 | 30 | 18183.404 | 0.166E-03 |
| 19 | 0 | 19 | 18 | 1 | 18 | 18250.337 | 0.540E-03 |
| 15 | 4 | 12 | 16 | 3 | 13 | 18280.100 | 0.146E-03 |
| 15 | 4 | 11 | 16 | 3 | 14 | 18280.326 | 0.146E-03 |
| 11 | 1 | 11 | 10 | 0 | 10 | 18349.973 | 0.728E-03 |
| 6  | 3 | 4  | 7  | 2 | 5  | 18399.780 | 0.919E-04 |
| 6  | 3 | 3  | 7  | 2 | 6  | 18401.146 | 0.919E-04 |
| 2  | 2 | 1  | 1  | 1 | 0  | 18514.610 | 0.247E-03 |
| 2  | 2 | 0  | 1  | 1 | 1  | 18523.431 | 0.247E-03 |
| 23 | 5 | 19 | 24 | 4 | 20 | 19365.573 | 0.855E-04 |
| 23 | 5 | 18 | 24 | 4 | 21 | 19365.590 | 0.855E-04 |
| 28 | 1 | 27 | 27 | 2 | 26 | 19420.871 | 0.118E-03 |
| 14 | 4 | 11 | 15 | 3 | 12 | 19486.866 | 0.163E-03 |
| 14 | 4 | 10 | 15 | 3 | 13 | 19487.021 | 0.163E-03 |
| 12 | 1 | 12 | 11 | 0 | 11 | 19504.957 | 0.834E-03 |
| 20 | 0 | 20 | 19 | 1 | 19 | 19528.886 | 0.583E-03 |
| 5  | 3 | 3  | 6  | 2 | 4  | 19606.453 | 0.758E-04 |
| 5  | 3 | 2  | 6  | 2 | 5  | 19607.212 | 0.758E-04 |
| 3  | 2 | 2  | 2  | 1 | 1  | 19712.010 | 0.306E-03 |
| 3  | 2 | 1  | 2  | 1 | 2  | 19738.494 | 0.307E-03 |
| 22 | 5 | 18 | 23 | 4 | 19 | 20572.537 | 0.104E-03 |
| 22 | 5 | 17 | 23 | 4 | 20 | 20572.549 | 0.104E-03 |
| 13 | 1 | 13 | 12 | 0 | 12 | 20656.044 | 0.937E-03 |
| 13 | 4 | 10 | 14 | 3 | 11 | 20693.536 | 0.179E-03 |
| 13 | 4 | 9  | 14 | 3 | 12 | 20693.639 | 0.179E-03 |
| 29 | 1 | 28 | 28 | 2 | 27 | 20749.671 | 0.119E-03 |
| 21 | 0 | 21 | 20 | 1 | 20 | 20810.086 | 0.619E-03 |
| 4  | 3 | 2  | 5  | 2 | 3  | 20812.957 | 0.529E-04 |
| 4  | 3 | 1  | 5  | 2 | 4  | 20813.336 | 0.529E-04 |
| 4  | 2 | 3  | 3  | 1 | 2  | 20905.003 | 0.380E-03 |
| 4  | 2 | 2  | 3  | 1 | 3  | 20958.026 | 0.382E-03 |
| 21 | 5 | 17 | 22 | 4 | 18 | 21779.415 | 0.124E-03 |
| 21 | 5 | 16 | 22 | 4 | 19 | 21779.423 | 0.124E-03 |
| 14 | 1 | 14 | 13 | 0 | 13 | 21803.330 | 0.103E-02 |
| 12 | 4 | 9  | 13 | 3 | 10 | 21900.121 | 0.191E-03 |
| 12 | 4 | 8  | 13 | 3 | 11 | 21900.188 | 0.191E-03 |
| 3  | 3 | 1  | 4  | 2 | 2  | 22019.338 | 0.253E-04 |
| 3  | 3 | 0  | 4  | 2 | 3  | 22019.500 | 0.253E-04 |
| 30 | 1 | 29 | 29 | 2 | 28 | 22082.294 | 0.118E-03 |
| 5  | 2 | 4  | 4  | 1 | 3  | 22093.591 | 0.463E-03 |
| 22 | 0 | 22 | 21 | 1 | 21 | 22093.770 | 0.647E-03 |
| 5  | 2 | 3  | 4  | 1 | 4  | 22182.070 | 0.467E-03 |
| 29 | 6 | 24 | 30 | 5 | 25 | 22864.634 | 0.456E-04 |
| 29 | 6 | 23 | 30 | 5 | 26 | 22864.634 | 0.456E-04 |
| 15 | 1 | 15 | 14 | 0 | 14 | 22946.920 | 0.112E-02 |
| 20 | 5 | 16 | 21 | 4 | 17 | 22986.214 | 0.146E-03 |
| 20 | 5 | 15 | 21 | 4 | 18 | 22986.219 | 0.146E-03 |
| 11 | 4 | 8  | 12 | 3 | 9  | 23106.633 | 0.198E-03 |
| 11 | 4 | 7  | 12 | 3 | 10 | 23106.675 | 0.198E-03 |
| 6  | 2 | 5  | 5  | 1 | 4  | 23277.775 | 0.553E-03 |
| 23 | 0 | 23 | 22 | 1 | 22 | 23379.763 | 0.667E-03 |
| 6  | 2 | 4  | 5  | 1 | 5  | 23410.683 | 0.559E-03 |
| 28 | 6 | 23 | 29 | 5 | 24 | 24071.620 | 0.570E-04 |
| 28 | 6 | 22 | 29 | 5 | 25 | 24071.620 | 0.570E-04 |
| 16 | 1 | 16 | 15 | 0 | 15 | 24086.924 | 0.120E-02 |
| 19 | 5 | 15 | 20 | 4 | 16 | 24192.940 | 0.168E-03 |
| 19 | 5 | 14 | 20 | 4 | 17 | 24192.944 | 0.168E-03 |
| 10 | 4 | 7  | 11 | 3 | 8  | 24313.084 | 0.199E-03 |
| 10 | 4 | 6  | 11 | 3 | 9  | 24313.109 | 0.199E-03 |
| 7  | 2 | 6  | 6  | 1 | 5  | 24457.557 | 0.648E-03 |
| 7  | 2 | 5  | 6  | 1 | 6  | 24643.933 | 0.658E-03 |
| 24 | 0 | 24 | 23 | 1 | 23 | 24667.886 | 0.677E-03 |
| 17 | 1 | 17 | 16 | 0 | 16 | 25223.463 | 0.127E-02 |

|    |   |    |    |   |    |           |           |
|----|---|----|----|---|----|-----------|-----------|
| 27 | 6 | 22 | 28 | 5 | 23 | 25278.535 | 0.704E-04 |
| 27 | 6 | 21 | 28 | 5 | 24 | 25278.535 | 0.704E-04 |
| 18 | 5 | 14 | 19 | 4 | 15 | 25399.600 | 0.191E-03 |
| 18 | 5 | 13 | 19 | 4 | 16 | 25399.602 | 0.191E-03 |
| 9  | 4 | 6  | 10 | 3 | 7  | 25519.481 | 0.192E-03 |
| 9  | 4 | 5  | 10 | 3 | 8  | 25519.495 | 0.192E-03 |
| 8  | 2 | 7  | 7  | 1 | 6  | 25632.943 | 0.745E-03 |
| 8  | 2 | 6  | 7  | 1 | 7  | 25881.898 | 0.760E-03 |
| 25 | 0 | 25 | 24 | 1 | 24 | 25957.954 | 0.680E-03 |
| 18 | 1 | 18 | 17 | 0 | 17 | 26356.666 | 0.132E-02 |
| 26 | 6 | 21 | 27 | 5 | 22 | 26485.383 | 0.858E-04 |
| 26 | 6 | 20 | 27 | 5 | 23 | 26485.383 | 0.858E-04 |
| 30 | 3 | 27 | 30 | 2 | 28 | 26578.707 | 0.317E-03 |
| 17 | 5 | 13 | 18 | 4 | 14 | 26606.199 | 0.214E-03 |
| 17 | 5 | 12 | 18 | 4 | 15 | 26606.201 | 0.214E-03 |
| 29 | 3 | 26 | 29 | 2 | 27 | 26610.985 | 0.366E-03 |
| 28 | 3 | 25 | 28 | 2 | 26 | 26640.347 | 0.419E-03 |
| 27 | 3 | 24 | 27 | 2 | 25 | 26666.943 | 0.476E-03 |
| 26 | 3 | 23 | 26 | 2 | 24 | 26690.931 | 0.537E-03 |
| 25 | 3 | 22 | 25 | 2 | 23 | 26712.465 | 0.601E-03 |
| 8  | 4 | 5  | 9  | 3 | 6  | 26725.834 | 0.177E-03 |
| 8  | 4 | 4  | 9  | 3 | 7  | 26725.842 | 0.177E-03 |
| 24 | 3 | 21 | 24 | 2 | 22 | 26731.702 | 0.668E-03 |
| 23 | 3 | 20 | 23 | 2 | 21 | 26748.796 | 0.737E-03 |
| 22 | 3 | 19 | 22 | 2 | 20 | 26763.901 | 0.806E-03 |
| 21 | 3 | 18 | 21 | 2 | 19 | 26777.167 | 0.875E-03 |
| 20 | 3 | 17 | 20 | 2 | 18 | 26788.741 | 0.941E-03 |
| 19 | 3 | 16 | 19 | 2 | 17 | 26798.767 | 0.100E-02 |
| 9  | 2 | 8  | 8  | 1 | 7  | 26803.935 | 0.843E-03 |
| 18 | 3 | 15 | 18 | 2 | 16 | 26807.385 | 0.106E-02 |
| 17 | 3 | 14 | 17 | 2 | 15 | 26814.728 | 0.111E-02 |
| 16 | 3 | 13 | 16 | 2 | 14 | 26820.925 | 0.116E-02 |
| 15 | 3 | 12 | 15 | 2 | 13 | 26826.100 | 0.119E-02 |
| 14 | 3 | 11 | 14 | 2 | 12 | 26830.369 | 0.121E-02 |
| 13 | 3 | 10 | 13 | 2 | 11 | 26833.843 | 0.122E-02 |
| 12 | 3 | 9  | 12 | 2 | 10 | 26836.627 | 0.121E-02 |
| 11 | 3 | 8  | 11 | 2 | 9  | 26838.817 | 0.118E-02 |
| 10 | 3 | 7  | 10 | 2 | 8  | 26840.504 | 0.114E-02 |
| 9  | 3 | 6  | 9  | 2 | 7  | 26841.771 | 0.108E-02 |
| 8  | 3 | 5  | 8  | 2 | 6  | 26842.694 | 0.998E-03 |
| 7  | 3 | 4  | 7  | 2 | 5  | 26843.341 | 0.898E-03 |
| 6  | 3 | 3  | 6  | 2 | 4  | 26843.773 | 0.778E-03 |
| 5  | 3 | 2  | 5  | 2 | 3  | 26844.044 | 0.637E-03 |
| 4  | 3 | 1  | 4  | 2 | 2  | 26844.199 | 0.469E-03 |
| 3  | 3 | 0  | 3  | 2 | 1  | 26844.278 | 0.267E-03 |
| 3  | 3 | 1  | 3  | 2 | 2  | 26844.332 | 0.267E-03 |
| 4  | 3 | 2  | 4  | 2 | 3  | 26844.362 | 0.469E-03 |
| 5  | 3 | 3  | 5  | 2 | 4  | 26844.423 | 0.637E-03 |
| 6  | 3 | 4  | 6  | 2 | 5  | 26844.531 | 0.779E-03 |
| 7  | 3 | 5  | 7  | 2 | 6  | 26844.705 | 0.899E-03 |
| 8  | 3 | 6  | 8  | 2 | 7  | 26844.967 | 0.998E-03 |
| 9  | 3 | 7  | 9  | 2 | 8  | 26845.341 | 0.108E-02 |
| 10 | 3 | 8  | 10 | 2 | 9  | 26845.856 | 0.114E-02 |
| 11 | 3 | 9  | 11 | 2 | 10 | 26846.542 | 0.118E-02 |
| 12 | 3 | 10 | 12 | 2 | 11 | 26847.434 | 0.121E-02 |
| 13 | 3 | 11 | 13 | 2 | 12 | 26848.567 | 0.122E-02 |
| 14 | 3 | 12 | 14 | 2 | 13 | 26849.983 | 0.121E-02 |
| 15 | 3 | 13 | 15 | 2 | 14 | 26851.722 | 0.119E-02 |
| 16 | 3 | 14 | 16 | 2 | 15 | 26853.831 | 0.116E-02 |
| 17 | 3 | 15 | 17 | 2 | 16 | 26856.357 | 0.112E-02 |
| 18 | 3 | 16 | 18 | 2 | 17 | 26859.350 | 0.107E-02 |
| 19 | 3 | 17 | 19 | 2 | 18 | 26862.863 | 0.101E-02 |
| 20 | 3 | 18 | 20 | 2 | 19 | 26866.953 | 0.947E-03 |
| 21 | 3 | 19 | 21 | 2 | 20 | 26871.675 | 0.881E-03 |
| 22 | 3 | 20 | 22 | 2 | 21 | 26877.091 | 0.813E-03 |
| 23 | 3 | 21 | 23 | 2 | 22 | 26883.263 | 0.744E-03 |
| 24 | 3 | 22 | 24 | 2 | 23 | 26890.255 | 0.676E-03 |
| 25 | 3 | 23 | 25 | 2 | 24 | 26898.134 | 0.610E-03 |
| 26 | 3 | 24 | 26 | 2 | 25 | 26906.968 | 0.546E-03 |
| 27 | 3 | 25 | 27 | 2 | 26 | 26916.828 | 0.485E-03 |
| 28 | 3 | 26 | 28 | 2 | 27 | 26927.785 | 0.428E-03 |
| 29 | 3 | 27 | 29 | 2 | 28 | 26939.913 | 0.375E-03 |
| 30 | 3 | 28 | 30 | 2 | 29 | 26953.287 | 0.327E-03 |
| 9  | 2 | 7  | 8  | 1 | 8  | 27124.669 | 0.864E-03 |
| 26 | 0 | 26 | 25 | 1 | 25 | 27249.777 | 0.673E-03 |
| 19 | 1 | 19 | 18 | 0 | 18 | 27486.666 | 0.136E-02 |
| 25 | 6 | 20 | 26 | 5 | 21 | 27692.170 | 0.103E-03 |

|    |   |    |    |   |    |           |           |
|----|---|----|----|---|----|-----------|-----------|
| 25 | 6 | 19 | 26 | 5 | 22 | 27692.170 | 0.103E-03 |
| 16 | 5 | 12 | 17 | 4 | 13 | 27812.744 | 0.235E-03 |
| 16 | 5 | 11 | 17 | 4 | 14 | 27812.745 | 0.235E-03 |
| 7  | 4 | 4  | 8  | 3 | 5  | 27932.151 | 0.152E-03 |
| 7  | 4 | 3  | 8  | 3 | 6  | 27932.155 | 0.152E-03 |
| 10 | 2 | 9  | 9  | 1 | 8  | 27970.541 | 0.938E-03 |
| 10 | 2 | 8  | 9  | 1 | 9  | 28372.350 | 0.966E-03 |
| 27 | 0 | 27 | 26 | 1 | 26 | 28543.162 | 0.659E-03 |
| 20 | 1 | 20 | 19 | 0 | 19 | 28613.609 | 0.138E-02 |
| 24 | 6 | 19 | 25 | 5 | 20 | 28898.898 | 0.123E-03 |
| 24 | 6 | 18 | 25 | 5 | 21 | 28898.898 | 0.123E-03 |
| 15 | 5 | 11 | 16 | 4 | 12 | 29019.240 | 0.253E-03 |
| 15 | 5 | 10 | 16 | 4 | 13 | 29019.240 | 0.253E-03 |
| 11 | 2 | 10 | 10 | 1 | 9  | 29132.767 | 0.103E-02 |
| 6  | 4 | 3  | 7  | 3 | 4  | 29138.438 | 0.118E-03 |
| 6  | 4 | 2  | 7  | 3 | 5  | 29138.440 | 0.118E-03 |
| 11 | 2 | 9  | 10 | 1 | 10 | 29625.053 | 0.107E-02 |
| 21 | 1 | 21 | 20 | 0 | 20 | 29737.643 | 0.139E-02 |
| 28 | 0 | 28 | 27 | 1 | 27 | 29837.913 | 0.638E-03 |
| 23 | 6 | 18 | 24 | 5 | 19 | 30105.573 | 0.144E-03 |
| 23 | 6 | 17 | 24 | 5 | 20 | 30105.573 | 0.144E-03 |
| 14 | 5 | 10 | 15 | 4 | 11 | 30225.691 | 0.267E-03 |
| 14 | 5 | 9  | 15 | 4 | 12 | 30225.691 | 0.267E-03 |
| 12 | 2 | 11 | 11 | 1 | 10 | 30290.621 | 0.111E-02 |
| 5  | 4 | 2  | 6  | 3 | 3  | 30344.702 | 0.778E-04 |
| 5  | 4 | 1  | 6  | 3 | 4  | 30344.702 | 0.778E-04 |
| 3  | 3 | 1  | 2  | 2 | 0  | 30462.951 | 0.990E-03 |
| 3  | 3 | 0  | 2  | 2 | 1  | 30462.962 | 0.990E-03 |
| 22 | 1 | 22 | 21 | 0 | 21 | 30858.926 | 0.138E-02 |
| 12 | 2 | 10 | 11 | 1 | 11 | 30882.905 | 0.116E-02 |
| 29 | 0 | 29 | 28 | 1 | 28 | 31133.829 | 0.612E-03 |
| 22 | 6 | 17 | 23 | 5 | 18 | 31312.197 | 0.166E-03 |
| 22 | 6 | 16 | 23 | 5 | 19 | 31312.198 | 0.166E-03 |
| 13 | 5 | 9  | 14 | 4 | 10 | 31432.103 | 0.275E-03 |
| 13 | 5 | 8  | 14 | 4 | 11 | 31432.103 | 0.275E-03 |
| 13 | 2 | 12 | 12 | 1 | 11 | 31444.112 | 0.119E-02 |
| 4  | 4 | 1  | 5  | 3 | 2  | 31550.948 | 0.348E-04 |
| 4  | 4 | 0  | 5  | 3 | 3  | 31550.948 | 0.348E-04 |
| 4  | 3 | 2  | 3  | 2 | 1  | 31669.139 | 0.110E-02 |
| 4  | 3 | 1  | 3  | 2 | 2  | 31669.194 | 0.110E-02 |
| 23 | 1 | 23 | 22 | 0 | 22 | 31977.623 | 0.136E-02 |
| 13 | 2 | 11 | 12 | 1 | 12 | 32146.041 | 0.124E-02 |
| 30 | 0 | 30 | 29 | 1 | 29 | 32430.709 | 0.580E-03 |
| 21 | 6 | 16 | 22 | 5 | 17 | 32518.776 | 0.190E-03 |
| 21 | 6 | 15 | 22 | 5 | 18 | 32518.776 | 0.190E-03 |
| 14 | 2 | 13 | 13 | 1 | 12 | 32593.250 | 0.125E-02 |
| 12 | 5 | 8  | 13 | 4 | 9  | 32638.480 | 0.276E-03 |
| 12 | 5 | 7  | 13 | 4 | 10 | 32638.480 | 0.276E-03 |
| 5  | 3 | 3  | 4  | 2 | 2  | 32875.286 | 0.123E-02 |
| 5  | 3 | 2  | 4  | 2 | 3  | 32875.449 | 0.123E-02 |
| 24 | 1 | 24 | 23 | 0 | 23 | 33093.904 | 0.133E-02 |
| 14 | 2 | 12 | 13 | 1 | 13 | 33414.611 | 0.132E-02 |
| 29 | 7 | 23 | 30 | 6 | 24 | 33604.833 | 0.665E-04 |
| 29 | 7 | 22 | 30 | 6 | 25 | 33604.833 | 0.665E-04 |
| 20 | 6 | 15 | 21 | 5 | 16 | 33725.311 | 0.214E-03 |
| 20 | 6 | 14 | 21 | 5 | 17 | 33725.311 | 0.214E-03 |
| 15 | 2 | 14 | 14 | 1 | 13 | 33738.047 | 0.131E-02 |
| 11 | 5 | 7  | 12 | 4 | 8  | 33844.826 | 0.269E-03 |
| 11 | 5 | 6  | 12 | 4 | 9  | 33844.826 | 0.269E-03 |
| 6  | 3 | 4  | 5  | 2 | 3  | 34081.363 | 0.138E-02 |
| 6  | 3 | 3  | 5  | 2 | 4  | 34081.743 | 0.138E-02 |
| 25 | 1 | 25 | 24 | 0 | 24 | 34207.945 | 0.128E-02 |
| 15 | 2 | 13 | 14 | 1 | 14 | 34688.772 | 0.138E-02 |
| 28 | 7 | 22 | 29 | 6 | 23 | 34811.520 | 0.803E-04 |
| 28 | 7 | 21 | 29 | 6 | 24 | 34811.520 | 0.803E-04 |
| 16 | 2 | 15 | 15 | 1 | 14 | 34878.516 | 0.134E-02 |
| 19 | 6 | 14 | 20 | 5 | 15 | 34931.807 | 0.238E-03 |
| 19 | 6 | 13 | 20 | 5 | 16 | 34931.807 | 0.238E-03 |
